1           **Glycosyltransferase homologs prevent promiscuous cell aggregation and**  
2           **promote multicellular development in the choanoflagellate *S. rosetta***

3

4   **Authors**

5   Laura A. Wetzel<sup>1</sup>, Tera C. Levin, Ryan E. Hulett, Daniel Chan, Grant A. King, Reef  
6   Aldayafleh, David S. Booth, Monika Abedin Sigg, and Nicole King<sup>2\*</sup>

7

8   **Author Affiliations**

9   Department of Molecular and Cell Biology and Howard Hughes Medical Institute,  
10   University of California, Berkeley, CA 94720-3200, USA

11

12   <sup>1</sup><https://orcid.org/0000-0003-0391-2542>

13   <sup>2</sup><https://orcid.org/0000-0002-6409-1111>

14

15   \*Corresponding author

16   Email: [nking@berkeley.edu](mailto:nking@berkeley.edu)

17   Phone: (510) 643-9395

18

19 **ABSTRACT**

20 The mechanisms underlying multicellular development in the earliest animals may be  
21 revealed through the study of the closest living relatives of animals, choanoflagellates.  
22 The emerging model choanoflagellate *S. rosetta* can develop from a single cell into a  
23 multicellular “rosette” through a process of serial cell divisions. Through a screen for  
24 rosette defect mutants, we have uncovered multiple *S. rosetta* mutants in which single  
25 cells fail to develop into orderly rosettes but instead aggregate promiscuously into  
26 amorphous clumps of cells. By mapping the genetic lesions underlying two of these  
27 clumping/rosette defect mutants, Jumble and Couscous, we found that both are  
28 monogenic and caused by mutations in genes encoding glycosyltransferases, enzymes  
29 that transfer activated sugars to donor molecules. These are only the second and third  
30 genes to be implicated in the regulation of multicellularity in choanoflagellates to date.  
31 Animal glycosyltransferases contribute to the production of the polysaccharide-rich  
32 glycocalyx that covers nearly all animal cells, regulate the activity of integrins and  
33 cadherins (proteins critical for development and cell-cell adhesion), and, when  
34 disrupted, can contribute to tumorigenesis. Our finding that glycosyltransferases in *S.*  
35 *rosetta* are required to prevent spurious cell adhesion in single cells and to promote  
36 proper cell adhesion during rosette development suggests a pre-metazoan role for  
37 glycosyltransferases in regulating development and preventing abnormal tumor-like  
38 multicellularity.

39

## 40 INTRODUCTION

41           The evolution of multicellular eukaryotes from their single-celled ancestors  
42 allowed for the diversification of complex macroscopic life (Leigh et al., 1995).  
43 Multicellularity has evolved independently in at least 16 different eukaryotic lineages  
44 (Bonner, 1998; King, 2004; Rokas, 2008), either through serial cell division or by  
45 aggregation of single cells. Both processes require cell-cell signaling and cell-cell  
46 adhesion, often mediated by interactions with a shared extracellular matrix (ECM).  
47 Perhaps because clonal multicellularity avoids the genetic conflicts associated with cell  
48 aggregation, most examples of “complex multicellularity” are found in lineages with  
49 clonal multicellularity (Knoll, 2011). In the case of animals, the complex multicellularity  
50 of the adult develops clonally as a single-celled zygote undergoes serial rounds of cell  
51 division followed by cell differentiation and tissue morphogenesis. Despite the centrality  
52 of multicellularity to the origin and diversification of animals, little is known about the  
53 genetic and developmental events that precipitated the transition to multicellularity in the  
54 animal stem lineage.

55           As the closest living relatives of animals (King et al., 2008; Ruiz-Trillo et al.,  
56 2008; Schalchian-Tabrizi et al., 2008), choanoflagellates can help to  
57 reveal the origins of animal multicellularity. *Salpingoeca rosetta* is an emerging  
58 model choanoflagellate that was isolated from nature as a spherical colony of cells  
59 called a rosette. Under standard laboratory conditions, *S. rosetta* proliferates as solitary  
60 cells or as linear chain colonies that easily break apart into solitary cells (Dayel et al.,  
61 2011). However, when exposed to rosette inducing factors (RIFs) produced by the prey  
62 bacterium *Algoriphagus machipongonensis*, *S. rosetta* instead develops into highly

63 organized and structurally stable rosettes through a process of serial cell division  
64 (Alegado et al., 2012; Dayel et al., 2011; Fairclough et al., 2010; Woznica et al., 2016).  
65 Therefore, the transition to rosette development in *S. rosetta* can be induced in culture.  
66 Additionally, *S. rosetta* has a sequenced genome (Fairclough et al., 2010), a sexual  
67 phase to its life cycle that enables controlled mating (Levin et al., 2014; Levin and King,  
68 2013; Woznica et al., 2017), and newly developed techniques that allow for transfection  
69 and expression of transgenes (Booth et al., 2018).

70         The growing experimental tractability of *S. rosetta* enabled a pioneering genetic  
71 screen, in which mutagenized cells were assessed for the ability to form rosettes in the  
72 presence of *Algoriphagus* RIFs (Levin et al., 2014). Multiple rosette defect mutants were  
73 recovered and displayed a range of phenotypes. The first mutant characterized in detail,  
74 Rosetteless, did not form rosettes in the presence of RIFs, but was otherwise  
75 indistinguishable from wild type cells (Levin et al., 2014). The mutation underlying the  
76 Rosetteless phenotype was mapped to a C-type lectin, encoded by the gene  
77 *rosetteless*, the first gene known to be required for rosette formation (Levin et al., 2014).  
78 Until the sequencing of choanoflagellate genomes and transcriptomes (Fairclough et al.,  
79 2013; King et al., 2008; Richter et al., 2018), C-type lectins were thought to be restricted  
80 to animals, where they act in signaling and adhesion to promote development and  
81 innate immunity (Levin et al., 2014). In *S. rosetta*, Rosetteless protein localizes near the  
82 membrane at the basal pole of each cell prior to rosette induction and is then secreted  
83 basally as part of an extracellular matrix that coats and connects the basal pole of each  
84 cell in rosettes (Levin et al., 2014). The localization of Rosetteless protein and its

85 requirement for rosette development led to the hypothesis that the protein may be  
86 essential for the structural integrity of rosettes (Levin et al., 2014).

87 Here we report on a class of mutants from the original rosette-defect screen that  
88 display a distinct phenotype; mutant cells in this class fail to form organized rosettes,  
89 but instead form large, amorphous clumps of cells in both the absence and presence of  
90 RIFs. We hereafter refer to this as a clumpy/rosette defect phenotype, as the two  
91 defects appear linked. By mapping the mutations underlying the clumpy/rosette defect  
92 phenotype using a newly developed bulk sequencing approach, we identified two  
93 predicted glycosyltransferase genes that are each essential for proper rosette  
94 development. The essentiality of glycosyltransferases for rosette development  
95 combined with prior findings of the requirement of a C-type lectin highlight the  
96 importance of the ECM for regulating multicellular rosette development and preventing  
97 spurious cell adhesion in a close relative of animals.

98

## 99 **RESULTS**

### 100 **Four rosette defect mutants form amorphous clumps of cells through** 101 **promiscuous cell adhesion**

102 The original rosette defect screen performed by Levin *et al.*, 2014 (Levin et al.,  
103 2014) yielded nine mutants that were sorted into seven provisional phenotypic classes.  
104 For this study, we continued the screen and identified an additional eight mutants that  
105 failed to form proper rosettes in the presence of *Algoriphagus* RIFs. Comparing the  
106 phenotypes of the 17 total rosette defect mutants in the presence and absence of RIFs  
107 allowed us to identify four broad phenotypic classes: (1) Class A mutants that produce

108 normal chains in the absence of RIFs and entirely lack rosettes in the presence of RIFs,  
109 (2) Class B mutants that produce normal chains in the absence of RIFs and develop  
110 reduced levels of rosettes with aberrant structures in the presence of RIFs, (3) Class C  
111 mutants that produce unusual clumps in the absence of RIFs and little to no rosettes in  
112 the presence of RIFs, and (4) Class D mutants that exist primarily as solitary swimmers,  
113 with no chains detected in the absence of RIFs and no rosettes detected in the  
114 presence of RIFs (Table S1).

115         Of the 17 rosette defect mutants isolated, eight mutants fell into Class C. For this  
116 study, we focused on four Class C mutants — Seafoam, Soapsuds, Jumble, and  
117 Couscous [previously named Branched (Levin et al., 2014)] — that form amorphous,  
118 tightly packed clumps of cells, both in the presence and absence of RIFs (Table 1;  
119 Figure 1A). We found that the clumps contain a few to hundreds of mutant cells that  
120 pack together haphazardly, unlike wild type rosettes in which all cells are oriented with  
121 their basal poles toward the rosette center and their apical flagella extending out from  
122 the rosette surface (Alegado et al., 2012; Levin et al., 2014; Woznica et al., 2016).  
123 Moreover, in contrast with the structural stability and shear resistance of wild type  
124 rosettes (Figure 1A) (Levin et al., 2014), the cell clumps formed by Class C mutants  
125 were sensitive to shear and separated into solitary cells upon pipetting or agitation of  
126 the culture flask (Figure 1A).

127         Following exposure to shear, we observed that mutant cells re-aggregated into  
128 new clumps within minutes, while wild type cells never formed clumps (Figure 1C, D;  
129 rare cell doublets were likely due to recent cell divisions). Within 30 minutes after  
130 disruption by shear force, cell clumps as large as 75, 55, 32, and 23 cells formed in

131 Couscous, Soapsuds, Seafoam, and Jumble mutant cultures, respectively. The cell  
132 adhesion was not strain-specific, as unlabeled Jumble and Couscous mutant cells  
133 adhered to wild type cells identified by their expression of cytoplasmic mWasabi (Figure  
134 S1). Therefore, the cell clumps are not aberrant rosettes, which never form through  
135 aggregation and instead form clonally through serial rounds of cell division (Dayel et al.,  
136 2011; Fairclough et al., 2010). The fact that eight Class C mutants isolated in this  
137 screen were also defective in rosette development suggests a direct link between  
138 promiscuous cell adhesion and failed rosette development. Each of the mutants tested  
139 also displayed a mild defect in cell proliferation (Figure S2).

140

#### 141 **Improving genetic mapping in *S. rosetta* through bulk segregant analysis**

142 We next set out to identify the causative mutation(s) underlying the clumping and  
143 rosette defect phenotypes in each of these mutants. The single prior mapping cross  
144 performed in *S. rosetta* revealed a lesion in a C-type lectin gene, *rosetteless*, that  
145 prevented proper rosette development (Levin et al., 2014). In the Levin *et al.* 2014  
146 study, the Rosetteless mutant was crossed to a phenotypically wild type Mapping Strain  
147 [previously called Isolate B (Levin et al., 2014)] and relied on genotyping of haploid F1s  
148 at 60 PCR-verified genetic markers that differed between the Rosetteless mutant and  
149 the Mapping Strain (Levin et al., 2014). The 60 markers were distributed unevenly  
150 across the 55 Mb genome and proved to be insufficient for mapping the Class C  
151 mutants for this study. Compounding the problem, the low level of sequence  
152 polymorphism among *S. rosetta* laboratory strains and abundance of repetitive  
153 sequences in the draft genome assembly (Fairclough et al., 2013; Levin et al., 2014)

154 made it difficult to identify and validate additional genetic markers, while genotyping at  
155 individual markers proved labor intensive and costly.

156 To overcome these barriers, we modified bulk segregation methods developed in  
157 other systems (Doitsidou et al., 2010; Leshchiner et al., 2012; Lister et al., 2009;  
158 Pomraning et al., 2011; Schneeberger et al., 2009; Voz et al., 2012; Wenger et al.,  
159 2010) for use in *S. rosetta*. Our strategy involved: (1) crossing mutants to the Mapping  
160 Strain (which contains previously identified sequence variants); (2) isolating  
161 heterozygous diploids identified through genotyping at a microsatellite on supercontig 1;  
162 (3) inducing meiosis; (4) growing up clonal cultures of haploid F1 offspring; (5)  
163 phenotyping the F1 offspring; (6) pooling F1 offspring based on their clumping  
164 phenotype; and (7) sequencing pooled genomic DNA from the F1 mutants to find  
165 mutations that segregated perfectly with the clumping phenotype (Figure S3).

166 To test whether a bulk segregant approach would work in *S. rosetta*, we first  
167 analyzed a cross between the previously mapped Rosetteless mutant and the Mapping  
168 Strain (Levin et al., 2014). We isolated 38 F1s with the rosette defect phenotype from a  
169 Mapping Strain×Rosetteless cross (Levin et al., 2014), grew clonal cultures from each,  
170 pooled the resulting cultures, extracted their genomic DNA, and sequenced the pooled  
171 mutant genomes to an average coverage of 187X (Table 2). Against a background of  
172 sequence variants that did not segregate perfectly with the Rosetteless phenotype, five  
173 unlinked single nucleotide variants (SNVs) and insertions/deletions (INDELs) were  
174 found to perfectly segregate with the phenotype. Four of these detected sequence  
175 variants were likely artefacts resulting from relatively low sequencing coverage that  
176 caused assembly errors, which are common in repetitive sections of the genome (Levin



177 et al., 2014) (Table 2). In contrast, the remaining SNV was detected in a well-assembled  
178 portion of the genome at a sequencing depth approaching the average coverage of the  
179 entire genome. The perfectly segregating SNV, at position 427,804 on supercontig 8,  
180 was identical to the causative mutation identified in Levin *et al.* 2014 (Levin et al., 2014)  
181 (Table 2). Thus, a method based on pooling of F1 haploid mutants, identification of  
182 sequence variants that perfectly segregated with the phenotype, and masking of those  
183 SNVs/INDELS that were detected with coverage far below that of the total genome was  
184 effective for correctly pinpointing the causal mutation for Rosetteless (Figure S3).

185 Therefore, we used this validated bulk segregant method to map the clumping mutants.

186 Mapping crosses were carried out for the four clumping/rosette defect mutants  
187 characterized in this study (Seafoam, Soapsuds, Jumble, and Couscous) and all four  
188 crosses yielded heterozygous diploids, demonstrating that they were competent to  
189 mate. As observed in prior studies of *S. rosetta* mating (Levin et al., 2014; Woznica et  
190 al., 2017), the diploid cells each secreted a flask-shaped attachment structure called a  
191 theca and were obligately unicellular. Therefore, the heterozygous diploids could not be  
192 assessed for either rosette defect or clumping phenotypes. For Seafoam and Soapsuds,  
193 we isolated heterozygous diploids, but never recovered F1 offspring with the mutant  
194 phenotype (Table 1). The inability to recover haploids with either clumping or rosette  
195 defect phenotypes from the Seafoam×Mapping Strain and Soapsuds×Mapping Strain  
196 crosses might be explained by any of the following: (1) the clumping/rosette defect  
197 phenotypes are polygenic, (2) meiosis defects are associated with the causative  
198 mutations, and/or (3) mutant fitness defects allowed wild type progeny to outcompete  
199 the mutant progeny. In contrast, heterozygous diploids from crosses of Jumble and

200 Couscous to the Mapping Strain produced F1 haploid progeny with both wild type and  
201 mutant phenotypes and thus allowed for the successful mapping of the causative  
202 genetic lesions, as detailed below.

203

#### 204 **Jumble maps to a putative glycosyltransferase**

205       Following the bulk segregant approach, we identified 5 sequence variants in  
206 Jumble that segregated perfectly with both the clumping and rosette defect. Only one of  
207 these – at position 1,919,681 on supercontig 1 – had sequencing coverage of at least  
208 0.5X of the average sequence coverage of the rest of the genome (Figure 2A; Table 3).  
209 In a backcross of mutant F1 progeny to the Mapping Strain, we confirmed the tight  
210 linkage of the SNV to the rosetteless phenotype (Figure 2B). Moreover, all F2 progeny  
211 that displayed a rosette defect also had a clumping phenotype. Given the tight linkage  
212 of both traits with the SNV and the absence of any detectable neighboring sequence  
213 variants, we infer that the single point mutation at genome position 1:1,919,681 causes  
214 both the clumping and rosette defect phenotypes in Jumble mutants.

215       The mutation causes a T to C transversion in a gene hereafter called *jumble*  
216 (GenBank accession EGD72416/NCBI accession XM\_004998928; Figure 2A). The  
217 *jumble* gene contains a single exon and is predicted to encode a 467 amino acid protein  
218 containing a single transmembrane domain. Following the convention established in  
219 Levin *et al.* 2014, the mutant allele, which is predicted to confer a leucine to proline  
220 substitution at amino acid position 305, is called *jumble*<sup>lw1</sup>.

221       We used recently developed methods for transgene expression in *S. rosetta*  
222 (Booth *et al.*, 2018) to test whether expression of a *jumble* with an N- or C-terminal

223 *monomeric teal fluorescent protein (mTFP)* gene fusion under the *S. rosetta elongation*  
224 *factor L (effl)* promoter could complement the mutation and rescue rosette development  
225 in the Jumble mutant (Figure 2C). Although stable integration of transgenes has not yet  
226 been established in *S. rosetta*, we were able to enrich for rare transfected cells by using  
227 a construct in which the puromycin resistance gene (*pac*) was expressed under the  
228 same promoter as the *jumble* fusion gene, with the two coding sequences separated by  
229 sequence encoding a self-cleaving peptide (Wang et al., 2015). After 48 hours of  
230 puromycin selection and the addition of RIFs, we detected  $9.33\% \pm 5.07\%$  and  
231  $7.00\% \pm 4.91\%$  of Jumble cells in rosettes with expression of either *jumble-mTFP* or  
232 *mTFP-jumble*, respectively (Figure 2C). Importantly, we did not detect any rosettes  
233 when we transfected Jumble cells with *mTFP* alone, *jumble<sup>lw1</sup>-mTFP*, or *mTFP-*  
234 *jumble<sup>lw1</sup>*. Complementation of the Jumble mutant by only the wild type *jumble* allele,  
235 albeit in a subset of the population, provides further confirmation that the mapping to  
236 GenBank accession EGD72416 was correct. The fact that the transfection experiment  
237 did not allow all cells to develop into rosettes may be due to any number of reasons,  
238 including incomplete selection against untransfected cells, differences in transgene  
239 expression levels in different transfected cells, and the possibility that the mTFP tag  
240 reduces or otherwise changes the activity of the Jumble protein.

241 We next sought to determine the function and phylogenetic distribution of the  
242 *jumble* gene. While BLAST searches did not uncover any clear *jumble* homologs in non-  
243 choanoflagellates, *jumble* homologs with clear sequence identity were detected in the  
244 transcriptomes of at least 9 other species of choanoflagellates representing each of the  
245 three major choanoflagellate clades (Richter et al., 2018) (Figure S4). Its broad

246 distribution among choanoflagellates suggests that *jumble* evolved before the origin and  
247 diversification of choanoflagellates. Interpro (Finn et al., 2017) and Pfam (Finn et al.,  
248 2016) did not reveal any known protein domains in Jumble. However, the NCBI  
249 Conserved Domain Search (Marchler-Bauer et al., 2017) predicted a  
250 glycosyltransferase domain with low confidence (E-value  $3.87^{-03}$ ). Moreover, two  
251 structural homology predictors, HHphred (Zimmermann et al., 2017) and Phyre (Kelly et  
252 al., 2015), revealed a constellation of structural domains (e.g. alpha helices and beta  
253 sheets; Figure S4) in Jumble that resemble those in well-annotated  
254 glycosyltransferases. The Leu305Pro substitution in Jumble<sup>w1</sup> disrupts one of those  
255 domains, a predicted alpha helix, which we hypothesize would prevent proper folding of  
256 the Jumble protein (Figure 2A).

257         Glycosyltransferases play essential roles in animal development (Sawaguchi et  
258 al., 2017; Zhang et al., 2008) and cell adhesion (Müller et al., 1979; Stratford, 1992).  
259 Their biochemical functions include transferring an activated nucleotide sugar, also  
260 called a glycosyl donor, to lipid, protein, or carbohydrate acceptors (Lairson et al.,  
261 2008). Target acceptors in animals include key signaling and adhesion proteins such as  
262 integrins and cadherins whose activities are regulated by N- and O-linked  
263 polysaccharide modifications, also referred to as N- and O-linked glycans (Larsen et al.,  
264 2017; Zhao et al., 2008). To investigate the localization of Jumble, we transfected wild  
265 type cells with a *jumble-mWasabi* gene fusion transcribed under the control of the *S.*  
266 *rosetta efl* promoter. Jumble-mWasabi protein localized to the apical pole of the cell  
267 body near the base of the flagellum. Based on comparisons with transmission electron  
268 micrographs of *S. rosetta* and other choanoflagellates, Jumble-mWasabi localization

269 corresponds to the location of the Golgi apparatus, for which there is not currently a  
270 fluorescent marker in *S. rosetta* (Figure 2D,F; Figure S5) (Leadbeater, 2015). Notably,  
271 many well-characterized glycosyltransferases act in the Golgi apparatus, where they  
272 glycosylate molecules as they are trafficked through the secretory system (El-Battari,  
273 2006; Tu and Banfield, 2010). In contrast, Jumble<sup>w1</sup>-mWasabi, was distributed in a  
274 tubular pattern throughout the cell and co-localized with an endoplasmic reticulum (ER)  
275 marker (Figure 2E,G; Figure S5B) (Booth et al., 2018). The failure of the Jumble<sup>w1</sup>  
276 protein to localize properly at the Golgi apparatus may cause a loss of function and help  
277 to explain the clumping and rosette defect phenotypes.

278

### 279 **Couscous maps to a lesion in a predicted mannosyltransferase**

280 We followed a similar strategy to map the genetic lesion(s) underlying the  
281 Couscous mutant phenotype. Using the bulk segregant approach on F1 mutant  
282 offspring from a Couscous × Mapping Strain cross, we identified eight sequence  
283 variants that segregated perfectly with the clumping and rosette defect phenotypes, of  
284 which only one – a single nucleotide deletion at position 462,534 on supercontig 22 –  
285 had sequencing coverage at least 0.5X of the average sequence coverage of the rest of  
286 the genome (Figure 3A; Table 4). Tight linkage of the deletion to both the clumping and  
287 rosette defect phenotypes was further confirmed by genotyping the sequence variant in  
288 F2 mutants resulting from backcrosses of F1 mutants to the Mapping Strain (Figure 3B).  
289 Given the tight linkage, we infer that the deletion at position 462,534 on supercontig 22  
290 causes both clumping and the disruption of rosette development in Couscous mutant  
291 cells.

292           The single nucleotide deletion at position 462,534 on supercontig 22 sits in a  
293 four-exon gene, hereafter called *couscous* (GenBank accession EGD77026/ NCBI  
294 accession XM\_004990809). The mutation causes a predicted frameshift leading to an  
295 early stop codon in the mutant protein, Couscous<sup>lw1</sup> (Figure 3A). As with the Jumble  
296 mutant, we were able to rescue rosette formation in a portion of the population by  
297 transfecting cells with either a *couscous-mTFP* or *mTFP-couscous* gene fusion under  
298 the *eff* promoter (Figure 3C, D), thereby increasing our confidence in the mapping  
299 results.

300           The predicted Couscous amino acid sequence contains a specific type of  
301 glycosyltransferase domain, an alpha-mannosyltransferase domain, that transfers  
302 activated mannose onto the outer chain of core N-linked polysaccharides and O-linked  
303 mannotriose (Strahl-Bolsinger et al., 1999). The predicted mannosyltransferase domain  
304 shares 28% and 35% amino acid sequence identity to alpha 1-2 mannosyltransferase  
305 (MNN2) proteins in *Saccharomyces cerevisiae* and *Candida albicans*, respectively,  
306 including the conserved DXD motif found in many families of glycosyltransferases  
307 (Wiggins and Munro, 1998) (Figure S6A). In these fungi, MNN2 catalyzes the addition of  
308 the first branch of mannose-containing oligosaccharides found on cell wall proteins  
309 (Rayner and Munro, 1998) and proper MNN2 activity is required for flocculation, or non-  
310 mating aggregation, in *S. cerevisiae* (Stratford, 1992). In addition, Couscous is  
311 predicted to have a PAN/Apple domain composed of a conserved core of three disulfide  
312 bridges (Ho et al., 1998; Tordai et al., 1999). PAN/Apple domains are broadly  
313 distributed among eukaryotes, including animals, where they mediate protein-protein

314 and protein-carbohydrate interactions, often on the extracellular surface of the cell (Ho  
315 et al., 1998; Tordai et al., 1999).

316 In wild type cells transfected with a *couscous-mWasabi* transgene under the *efl*  
317 promoter, Couscous was found in puncta scattered about the cytosol, collar and cell  
318 membrane (Figure S6B, C). While Couscous-mWasabi was clearly not localized to the  
319 Golgi, the puncta may co-localize with the ER, where glycosyltransferases are also  
320 known to function (El-Battari, 2006; Tu and Banfield, 2010). However, despite  
321 attempting to co-transfect cells with *couscous-mWasabi* and a marker of the ER, we  
322 were unable to detect any cells expressing both constructs. In addition, it is possible  
323 that the fusion of Couscous to a fluorescent protein or its overexpression interfered with  
324 its proper localization in *S. rosetta*. Therefore, we are currently uncertain about the  
325 subcellular localization of Couscous protein.

326

### 327 **Jumble and Couscous mutants lack proper sugar modifications at the basal pole**

328 Because both Jumble and Couscous have mutations in putative  
329 glycosyltransferases, we hypothesized that the abundance or distribution of cell surface  
330 sugars, called glycans, on Jumble and Couscous mutant cells might be altered. To  
331 investigate the distribution of cell surface glycans, we stained live *S. rosetta* with diverse  
332 fluorescently labelled sugar-binding lectins. Of the 22 lectins tested, 21 either did not  
333 recognize *S. rosetta* or had the same staining pattern in wild type, Jumble and  
334 Couscous cells (Table S2).

335 The remaining lectin, jacalin, bound to the apical and basal poles of wild type  
336 cells (Figure 4B, B'). In rosettes, jacalin also brightly stained the interior ECM in a

337 pattern reminiscent of Rosetteless (Levin et al., 2014) (Figure 4A, B'), although the two  
338 were not imaged simultaneously because jacalin does not bind after cell fixation and  
339 labelled Rosetteless antibodies accumulate strongly in the food vacuoles of live cells. In  
340 contrast with wild type cells, in Couscous and Jumble mutants the basal patch of jacalin  
341 staining was absent or significantly diminished, both in the presence and absence of  
342 RIFs (Figure 4 C, D). Interestingly, the apical patch of jacalin binding in mutant cells  
343 appeared similar to wild type cells. This may explain the lack of a clear difference in  
344 bands detected with jacalin by western blot between mutants (Figure S7).

345         The loss of basal jacalin staining indicated that the Jumble and Couscous  
346 mutations either disrupt proper trafficking of sugar-modified molecules to the basal pole  
347 of cells or alter the glycosylation events themselves. Thus, we examined whether the  
348 basal secretion of Rosetteless protein was disrupted in the mutant strains. In both  
349 Jumble and Couscous, Rosetteless properly localized to the basal pole, but its  
350 expression did not increase nor was it secreted upon treatment with RIFs, as normally  
351 occurs in wild type cells (Figure S8). Because Rosetteless is required for rosette  
352 development, this failure to properly upregulate and secrete Rosetteless might  
353 contribute to the rosette defect phenotype in Jumble and Couscous cells.

354

## 355 **DISCUSSION**

356         Of the 17 rosette defect mutants isolated in Levin *et al.* 2014 and in this study,  
357 almost half (8) also display a mild to severe clumping phenotype. This suggests that  
358 mechanisms for preventing promiscuous adhesion among wild type cells are diverse  
359 and can be easily disrupted. We found that the clumping phenotype results from



360 promiscuous adhesion of mutant cells to other mutant or wild type cells rather than from  
361 incomplete cytokinesis. Importantly, the tight coupling of the rosette defect and clumping  
362 phenotypes survived recombination in both the Jumble×Mapping Strain and  
363 Couscous×Mapping Strain crosses, indicating that the mutation that causes  
364 promiscuous adhesion in each of these mutants also explains the loss of rosette  
365 development.

366         For both Jumble and Couscous, the causative mutations mapped to predicted  
367 glycosyltransferase genes. Consistent with its role as a glycosyltransferase, Jumble  
368 localized to the Golgi apparatus, but Couscous appeared to localize in cytoplasmic  
369 puncta and to the cell membrane. In apicomplexan and oomycete parasites, PAN/Apple  
370 domains are found in secreted adhesive proteins that mediate parasite attachment and  
371 invasion of host cells (Brown et al., 2001). Therefore, Couscous might play an additional  
372 role in cell-cell adhesion or signal transduction due to the presence of the PAN/Apple  
373 domain.

374         We predict that the glycosyltransferase mutations are loss of function alleles,  
375 given that transfection of mutant *S. rosetta* with the wild type alleles was sufficient to  
376 complement each of the mutations. While we have not uncovered the target(s) of the  
377 glycotransferases or the exact nature of the interplay between the two phenotypes,  
378 disruption of the glycocalyx at the basal pole of both Jumble and Couscous mutant cells  
379 (Figure 4) hints that the regulation of ECM could play a role in preventing clumping and  
380 in promoting proper rosette development.

381         One possible explanation for the clumping phenotype is that *jumble* and  
382 *couscous* are required to regulate the activity of cell surface adhesion molecules and

383 receptors. Glycosylation regulates the activities of two key adhesion proteins in animals:  
384 integrins that regulate ECM adhesion, and cadherins that, among their various roles in  
385 cell signaling and animal development, bind other cadherins to form cell-cell adhesions  
386 called adherens junctions [22,26]. Cadherin activity can be either positively or negatively  
387 regulated by glycosyltransferases. For example, epithelial cadherin (E-cadherin) is  
388 modified by N-acetylglucosaminyltransferase III (GnT-III) whose activity leads to  
389 increased cell adhesion and N-acetylglucosaminyltransferase V (GnT-V) whose activity  
390 leads to decreased cell adhesion (Carvalho et al., 2016; Granovsky et al., 2000). GnT-V  
391 knockdown enhances cell-cell adhesion mediated by E-cadherin and the related N-  
392 cadherin (Carvalho et al., 2016; Guo et al., 2009). The inactivation of E-cadherin,  
393 including through over- or under- expression of GnT-V or GnT-III, is considered to be a  
394 hallmark of epithelial cancers (Hirohashi and Kanai, 2003). While we do not yet know  
395 the targets of *Jumble* and *Couscous* activity, *S. rosetta* expresses 29 different cadherins  
396 (Nichols et al., 2012). Therefore, mutations to *jumble* and *couscous* might disrupt  
397 regulatory glycosylation of a cell adhesion molecule, like cadherin, and thereby promote  
398 adhesion.

399 Another possibility is that *jumble* and *couscous* add a protective sugar layer to  
400 the cell surface and loss of glycosyltransferase activity reveals underlying sticky  
401 surfaces. If *jumble* and *couscous* add branches to existed sugar modifications, their loss  
402 of function could expose new sugar moieties at the cell surface that might act as ligands  
403 for lectins that aggregate cells. Lectins mediate cell aggregation in diverse organisms.  
404 For example, sponges such as *Geodia cydonium* can be disaggregated into single cells  
405 and then reaggregated through lectin binding of a post-translational sugar modification

406 (Müller et al., 1979). In *S. cerevisiae*, the mannosyltransferase MNN2 adds mannose  
407 structures to the cell wall that are recognized by aggregating lectins and MNN2 is  
408 required for proper flocculation (Rayner and Munro, 1998; Stratford, 1992). Exposing  
409 new sugars on the cell surface in Jumble and Couscous could lead to spurious  
410 aggregation, potentially by lectins or other sugar binding proteins.

411         It is somewhat more difficult to infer how increased clumping in single cells might  
412 interfere with rosette development. One possibility is that the disruption of ECM  
413 glycosylation that we hypothesize might promote clumping may also prevent the proper  
414 maturation of the ECM needed for rosette development (Figure 5). A prior study showed  
415 that *S. rosetta* cells lacking a target of the lectin wheat germ agglutinin (WGA) are not  
416 competent to form rosettes, highlighting the potential importance of glycosylated  
417 molecules for rosette development (Dayel et al., 2011). While WGA staining does not  
418 appear to be perturbed in Jumble and Couscous (Table S2), jacalin staining at the basal  
419 pole appears severely reduced or abolished compared to wild type. Jacalin staining was  
420 enriched in the center of wild type rosettes in a pattern reminiscent of Rosetteless,  
421 which is required for rosette development [3]. Intriguingly, in Jumble and Couscous,  
422 Rosetteless localized to the correct pole, but did not become enriched upon induction  
423 indicating that the ECM did not properly mature. Rosetteless has mucin-like Ser/Thr  
424 repeats that are predicted sites of heavy glycosylation and two C-type lectin domains  
425 that would be expected to bind to sugar moieties (Levin et al., 2014). Therefore, it is  
426 possible that Rosetteless might be regulated either through direct glycosylation or  
427 through the glycosylation of potential binding partners by Jumble and Couscous.

428           The clumping, rosetteless mutants underscore the difference between cell  
429 aggregation and a regulated clonal developmental program, such as embryogenesis or  
430 rosette development. Several studies assert that aggregation can only be evolutionarily  
431 stable if limited to close relatives (Brunet and King, 2017; Gilbert et al., 2007; Kuzdzal-  
432 Fick et al., 2011) and recent studies experimentally evolving multicellularity in yeast and  
433 the green alga *Chlamydomonas reinhardtii* resulted in isolates that formed clonally  
434 (Ratcliff et al., 2013, 2012). Together this work supports the idea that, despite both  
435 aggregation and clonal multicellularity relying on cell-cell adhesion, aggregative  
436 multicellularity likely was not an initial step in the evolution of clonal multicellularity. The  
437 high co-occurrence of cell aggregation and the loss of rosette development show that  
438 aggregative multicellularity might block clonal multicellularity in *S. rosetta* and that the  
439 two forms of multicellularity cannot easily be interconverted.

440

## 441 **MATERIALS AND METHODS**

### 442 **Media preparation, strains, and cell culture**

443           Unenriched artificial seawater (ASW), AK artificial seawater (AK), cereal grass  
444 media (CG), and high nutrient (HN) media were prepared as described previously  
445 (Booth et al., 2018; Levin et al., 2014; Levin and King, 2013). Our wild type strain, from  
446 which each mutant was generated, was the described strain SrEpac (ATCC PRA-390;  
447 accession number SRX365844) –*S. rosetta* co-cultured monoxenically with the prey  
448 bacterium *Echinicola pacifica* (Levin et al., 2014; Levin and King, 2013;  
449 Nedashkovskaya et al., 2006). Seafoam, Soapsuds, and Couscous (previously named  
450 Branched) were generated through X-ray mutagenesis and Jumble was generated by

451 EMS mutagenesis as first documented in (Levin et al., 2014). For routine culturing, wild  
452 type and mutant cultures were diluted 1:10 every 2-3 days in HN media. The Mapping  
453 Strain, previously called Isolate B, used for mapping crosses (accession number  
454 SRX363839) contains *S. rosetta* grown in the presence of *A. machipongonensis*  
455 bacteria. The Mapping Strain was maintained in 25% CG media diluted in ASW and  
456 passaged 1:10 every 2-3 days. For transfection of *S. rosetta*, cells were maintained in  
457 5% (vol/vol) HN media in AK seawater (Booth et al., 2018). Rosette induction was  
458 performed with either live *A. machipongonensis* (ATCC BAA-2233) (Alegado et al.,  
459 2012) or *A. machipongonensis* outer membrane vesicles (OMVs) prepared as in  
460 (Woznica et al., 2016); both are referred to as rosette inducing factors (RIFs).

#### 461 **Imaging and quantify rosette phenotypes**

462 To image rosette phenotypes (Figure 1A), cells were plated at a density of  $1 \times 10^4$   
463 cells/ml in 3 ml HN media either with or without 1:500 *Algoriphagus* OMVs. Cultures  
464 were imaged after 48 hr induction in 8-well glass bottom dishes (ibidi 15  $\mu$ -Slide 8 well  
465 80826) that were coated with 0.1 mg/mL poly-D-lysine (Sigma) for 15 min and washed 3  
466 times with water to remove excess poly-D-lysine. For both uninduced and induced  
467 images, 200  $\mu$ l of cells were plated with a wide bore pipette tip for minimal disruption  
468 and allowed to settle for 5 min. For vortexed images, 200  $\mu$ l of cells were vortexed for  
469 15 second before plating and imaged within 10 mins of plating to prevent re-clumping.  
470 Cells were imaged live by differential interference contrast microscopy using a Zeiss  
471 Axio Observer.Z1/7 Widefield microscope with a Hamamatsu Orca-Flash 4.0 LT CMOS  
472 Digital Camera and a 63x/NA1.40 Plan-Apochromatic oil immersion lens with 1.6X  
473 optivar setting.

474 To quantify rosette induction, cells were plated at a density of  $1 \times 10^4$  cells/ml in 3  
475 ml HN media with 1:500 *Algoriphagus* OMVs. After 48 hr, an aliquot of cells was  
476 vortexed vigorously for 15 secs and fixed with formaldehyde. Rosette formation counted  
477 by hemacytometer and rosettes assessed as clusters of 3 or more cells.

#### 478 **Imaging and quantification of clumping**

479 Clumps were quantified using a modified protocol from (Woznica et al., 2017).  
480 To prevent spurious sticking, 6 well glass bottom dishes were coated with 1% BSA for 1  
481 hr and washed 3 times with water to remove any remaining BSA. Cells were diluted to  
482  $5 \times 10^5$  cells/mL, vortexed for 15 secs to break apart any pre-formed clumps and plated  
483 in the BSA pre-treated dishes. For quantification, DIC images were taken using Zeiss  
484 Axio Observer.Z1/7 Widefield microscope with a Hamamatsu Orca-Flash 4.0 LT CMOS  
485 Digital Camera and a 20x objective. Images were collected for each strain from 10  
486 distinct locations throughout the well.

487 Images were batched processed in ImageJ for consistency. To accurately  
488 segment the phase bright cells and limit signal from the phase dark bacteria the  
489 following commands were applied: 'Smooth', 'Find Edges', 'Despeckle', 'Make Binary',  
490 'Dilate', 'Erode' and 'Fill Holes'. Finally, images were analyzed with the 'Analyze  
491 Particles' command to calculate the area of the clump and only particles larger than 20  
492  $\mu\text{m}^2$  were kept. Cells equivalents/clump (right y axis) were calculated by dividing the  
493 area of the clump by the area of an individual cells (as determined by the average area  
494 of the wt cells). Data are presented as violin boxplots, showing the median cell number  
495 (middle line), interquartile range (white box), and range excluding outliers (thin line). A

496 minimum of 630 clumps from two biological replicates were measured for each  
497 condition.

#### 498 **Performing mapping crosses**

499 Crosses for each mutant strain (Seafoam, Soapsuds, Jumble, and Couscous)  
500 with Mapping Strain (previously described as Isolate B) were attempted through both  
501 nutrient limitation for 11 days and addition of 5% *Vibrio fischeri* spent media (Levin and  
502 King, 2013; Woznica et al., 2017). Mating was induced, and cells were plated by limiting  
503 dilution to isolate diploid clones. Thecate isolates, as the only documented diploid cell  
504 type (Levin et al., 2014; Woznica et al., 2017), were genotyped. From each thecate  
505 isolate population, we extracted DNA from 75  $\mu$ l of cells by pelleting cells, resuspending  
506 in 10  $\mu$ l of base solution (25 mM NaOH, 2 mM EDTA), transferring samples into PCR  
507 plates, boiling at 100°C for 20 min, followed by cooling at 4°C for 5 min, and then adding  
508 10  $\mu$ l Tris solution (40 mM Tris-HCl, pH 7.5). We used 2  $\mu$ l of this sample as the DNA  
509 template for each genotyping reaction. We identified heterozygous clones by  
510 genotyping PCR at a single microsatellite genotyping marker at position 577,135 on  
511 supercontig 1 (Forward primer: GACAGGGCAAACAGACAGA and Reverse primer:  
512 CCATCCACGTTTCATTCTCCT) that distinguishes a 25 bp deletion in the Mapping  
513 Strain (199 bp) from mutants (217 bp). Isolates containing both markers were saved,  
514 and meiosis induced by rapid passaging every day in CG medium. For both Seafoam  
515 and Soapsuds, we were able to generate putative outcrossed diploids to the Mapping  
516 Strain based on the single genotyping marker, but we only ever able to recover rosette  
517 F1 haploids and never isolated any F1 haploids with the clumpy, rosetteless phenotype.

518 For the successful Jumble cross, we took fast growing, regularly passaged  
519 strains and set up starvation conditions for the cross. We pelleted  $2 \times 10^6$  cells/mL of  
520 each strain together and resuspended in 10mL of ASW. After 11 days of starvation in  
521 ASW, we pelleted all cells and resuspended in 100% CG media. After 3 days of  
522 recovery, we isolated clones by limiting dilution in 10% CG media in ASW (vol/vol). The  
523 probability of clonal isolation in this step was 0.91-0.93. Three heterozygous isolates,  
524 each in the thecate life history, were identified and carried forward. To induce meiosis,  
525 isolates were passaged 1:2 in 25% CG media in ASW (vol/vol) every 1-2 days for 8  
526 days. As soon as rosettes and swimming cells were identified, we repeated clonal  
527 isolation (probability of clonal isolation 0.85-0.98). We collected any isolates that formed  
528 purely rosettes or chains and ignored any thecate wells assuming that these  
529 represented diploid cells. 56% of all swimming isolates were clumpy chains, consistent  
530 with Mendelian segregation of a single locus. Isolates were genotyped with the marker  
531 on supercontig 1 to ensure that independent assortment of the genotype and the  
532 phenotype indeed occurred. In total, 30 clumpy F1s were grown up for bulk segregation  
533 analysis.

534 For the successful Couscous cross, a mixture of  $1 \times 10^6$  Couscous and the  
535 Mapping Strain cells at stationary phase were induced to mate in 5% *Vibrio fischeri*  
536 spent media in ASW (vol/vol) (Woznica et al., 2017). After 24 hr, the cells were pelleted  
537 and resuspended in 5% HN media in ASW (vol/vol) and allowed to recover for 24 hr.  
538 Then we isolated clones by limiting dilution in 10% CG media in ASW (vol/vol). The  
539 probability of clonal isolation in this step was between 0.97-0.98. We extracted DNA as  
540 described above and identified heterozygous clones by genotyping PCR at a single



541 microsatellite genotyping marker on supercontig 1. Four heterozygous isolates, each in  
542 the thecate stage, were identified and carried forward. To induce meiosis, isolates were  
543 passaged 1:2 in 25% CG media in ASW (vol/vol) every 1-2 days for 8 days. As soon as  
544 rosettes and swimming cells were identified, we repeated clonal isolation (probability of  
545 clonal isolation 0.78-0.97). We collected any isolates that formed purely rosettes or  
546 chains and ignored any thecate wells assuming that these represented diploid cells.  
547 Only 14.6% of swimming isolates were clumpy chains; this deviation from a Mendelian  
548 ratio may be indicative a potential fitness defect of the mutant phenotype. Isolates were  
549 genotyped with the marker on supercontig 1 to ensure that independent assortment  
550 indeed occurred. In total, 22 haploids were collected for bulk segregant analysis.

#### 551 **Whole genome re-sequencing**

552 Jumble and Couscous were re-sequenced individually in order to identify  
553 mutation carried in each strain. To do this, Jumble and Couscous cells were grown to  
554 stationary phase in 500 mL of 5% HN media in ASW (vol/vol). To generate bulk  
555 segregant samples, we grew up  $5 \times 10^6$  Rosetteless $\times$ Mapping Strain (Levin et al., 2014)  
556 and Jumble $\times$ Mapping Strain and  $1 \times 10^7$  Couscous $\times$ Mapping Strain mutant F1s cells of  
557 each isolate. For all samples, we extracted DNA by phenol chloroform extraction and  
558 used a CsCl gradient to separate *S. rosetta* DNA from contaminating *E. pacifica* DNA by  
559 GC content (King et al., 2008).

560 Multiplexed, 150 bp paired-end libraries were prepared and sequenced on an  
561 Illumina HiSeq 4000. Raw reads were trimmed with TrimmomaticPE (Bolger et al.,  
562 2014) to remove low quality base calls. Trimmed reads were mapped to the *S. rosetta*  
563 reference genome (Fairclough et al., 2013) using Burrows-Wheeler Aligner (Li and

564 Durbin, 2009), and we removed PCR duplicates with Picard  
565 (<http://broadinstitute.github.io/picard/>). We realigned reads surrounding indel calls using  
566 GATK (Depristo et al., 2011) and called variants using SAMtools and bcftools (Li et al.,  
567 2009).

### 568 **Bulk segregant sequencing analysis**

569 No large region of the genome (i.e. haplotype block) was found to co-segregate  
570 with the mutant phenotype in any of the crosses, likely because of the sparse, uneven  
571 distribution of genetic markers. To find segregating variants in the pooled samples,  
572 variant call files were intersected with vcftools vcf-isec (Danecek et al., 2011) by: (1)  
573 finding any variants shared with the mutant strain in the cross, (2) removing any variants  
574 shared with the Mapping Strain (Isolate B), wild type (previously Isolate C), and the  
575 unmutagenized control from the Rosetteless mutagenesis (C2E5) (Levin et al., 2014;  
576 Levin and King, 2013). The remaining variants were filtered by quality: depth >2, quality  
577 score >10, and reference allele not N. The remaining list represents high quality variants  
578 in the pooled population that are shared with the mutant to the exclusion 3 different  
579 strains competent to form rosettes. Segregating variants were determined by dividing  
580 the number of reads that map to the alternative allele by the total number of high quality  
581 reads determined by SAMtools and bcftools (Li et al., 2009); any variants with >99% of  
582 reads that map to the alternative allele were considered variants that segregated  
583 perfectly with the mutant phenotype.

### 584 **Backcrosses**

585 For Jumble, a cross was set up with  $1 \times 10^6$  mutant F1 and the Mapping Strain.  
586 Cells were mixed, pelleted, resuspending in 10 mL of 5% *Vibrio fischeri* spent media in

587 ASW (vol/vol). After 24 hr, media was replaced with 25% CG media in ASW (vol/vol)  
588 and cells were plated to limiting dilution. Thecate isolates were genotyped by  
589 genotyping marker on supercontig 1; 4 heterozygous diploids were isolated (probability  
590 of clonal isolation 0.79-0.95). Isolates were rapidly passaged for 2 weeks to induce  
591 meiosis before being plated for clonal isolation (probability of clonal isolation 0.95-0.98).  
592 12 clumps and 9 rosettes were isolated, DNA extracted using Base-Tris method  
593 described above, and the region around the causal mutation was amplified. The  
594 resultant PCR product was diagnostically digested for 4 hr with Bfal, which cleaves the  
595 mutant allele but not the wt, and products were distinguished by agarose gel  
596 electrophoresis.

597 For Couscous, two crosses were set up with  $2.5 \times 10^5$  mutant F1s from two  
598 different isolates and the Mapping Strain. Cells were mixed, pelleted, resuspending in  
599 0.5 mL of 2.5% *Vibrio fischeri* spent media in ASW (vol/vol). After 24 hr, media was  
600 replaced with 25% CG media in ASW (vol/vol) and cells were plated to limiting dilution  
601 (probability of clonal isolation 0.85-0.97). Thecate isolates were genotyped with the  
602 same genotyping marker on supercontig 1; 3 heterozygous diploids were isolated from  
603 each cross. Isolates were rapidly passaged for 2 weeks to induce meiosis before being  
604 plated for clonal isolation (probability of clonal isolation 0.88-0.97). 51 chains and 38  
605 rosettes were isolated, DNA extracted using Base-Tris method described above, the  
606 region around the causal mutation was amplified, and the resultant PCR product was  
607 Sanger sequenced.

608 **Jumble and Couscous domain and structure prediction and alignment**

609 Jumble domains were predicted using Interpro (Finn et al., 2017), pfam (Finn et  
610 al., 2016), and the NCBI Conserved Domain Search (Marchler-Bauer et al., 2017).  
611 Structural homology was performed with Phyre2 (Kelly et al., 2015) and HHphred  
612 (Zimmermann et al., 2017). The alignment from the top hit on HHphred, human GlcNAc  
613 T4 catalytic domain structure was aligned to the predicted Jumble structure using the  
614 PyMOL Molecular Graphics System, Version 2.0 Schrödinger, LLC. Other  
615 choanoflagellate homologs were determined by reciprocal BLAST of the 20 sequenced  
616 choanoflagellate transcriptomes (Richter et al., 2018) and alignment were performed  
617 with ClustalX (Larkin et al., 2007). Couscous domains were predicted using Interpro  
618 (Finn et al., 2017) and pfam (Finn et al., 2016), and alignment to yeast MNN2  
619 glycosyltransferase domains were performed with ClustalX (Larkin et al., 2007).

#### 620 **Generating transgenic constructs**

621 Jumble (GenBank accession EGD72416/NCBI accession XM\_004998928) and  
622 Couscous (GenBank accession EGD77026/ NCBI accession XM\_004990809) were  
623 cloned from wild type cDNA prepared as described in (Booth et al., 2018). Jumble<sup>lw1</sup>  
624 was cloned from cDNA prepared from the Jumble mutant. Couscous<sup>lw1</sup> could not be  
625 cloned from cDNA directly (possibly because of low mRNA levels due to nonsense  
626 mediate decay or simply because of high GC content of the gene). However, the 1 bp  
627 deletion in *Couscous*<sup>lw1</sup> was confirmed by Sanger sequencing of genomic Couscous  
628 DNA. Site directed mutagenesis of the wild type gene was used to generate the mutant  
629 allele.

630 For complementation, constructs were generated from a plasmid with a pUC19  
631 backbone with a 5' *S. rosetta* elongation factor L (*efl*) promoter, monomeric teal

632 fluorescent protein (*mTFP*), and the 3' UTR from actin (Addgene ID NK633) (Booth et  
633 al., 2018). A puromycin resistance gene was synthesized as a gene block and codon  
634 optimized for *S. rosetta*. The puromycin resistance gene (*puro*) was inserted after the  
635 *efl* promoter and separated from fluorescent reporters by self-cleaving 2A peptide from  
636 the porcine virus (P2A) (Kim et al., 2011). Copies of *jumble*, *jumble<sup>hw1</sup>*, *couscous*, and  
637 *couscous<sup>hw1</sup>* were inserted either 5' or 3' of the mTFP and separated from mTFP by a  
638 flexible linker sequence (SGGSGGS) through Gibson cloning.

639 For fluorescent localization, constructs were generated from a pUC19 backbone  
640 with a 5' *S. rosetta* elongation factor L (*efl*) promoter, mWasabi, and 3' UTR from actin.  
641 Copies of *jumble*, *jumble<sup>hw1</sup>*, and *couscous* were inserted either 5' of the mWasabi  
642 separated by a flexible linker sequence (SGGSGGS) through Gibson cloning. Plasma  
643 membrane and ER markers from (Booth et al., 2018) were used as previously described  
644 (Addgene ID NK624 and NK644).

#### 645 ***S. rosetta* transfection and transgene expression**

646 Transfection protocol was followed as described in (Booth et al., 2018)  
647 (<http://www.protocols.io/groups/king-lab>). Two days prior to transfection, a culture flask  
648 (Corning, Cat. No. 353144) was seeded with Jumble, Couscous, or wild type cells at a  
649 density of 5,000 cells/ml in 200 ml of 1x HN Media. After 36-48 hr of growth, bacteria  
650 were washed away from the cells in three consecutive rounds of centrifugation and  
651 resuspension in sterile AK seawater. After the final wash, the cells were resuspended in  
652 a total volume of 100  $\mu$ l AK and counted on a Luna-FL automated cell counter (Logos  
653 Biosystems). The remaining cells were diluted to a final concentration of  $5 \times 10^7$  cells/ml  
654 and divided into 100  $\mu$ l aliquots. Each aliquot of cells pelleted at 2750 x g, resuspend in

655 priming buffer (40 mM HEPES-KOH, pH 7.5; 34 mM Lithium Citrate; 50 mM L-Cysteine;  
656 15% (w/v) PEG 8000; and 1  $\mu$ M papain), and incubated at room temperature for 30  
657 mins to remove extracellular material coating the cells. Priming buffer was quenched  
658 with 50 mg/ml bovine serum albumin-fraction V (Sigma). Cells were pelleted at 1250 x g  
659 and resuspend in 25  $\mu$ l of SF buffer (Lonza). Each transfection reaction was prepared  
660 by adding 2  $\mu$ l of “primed” cells to a mixture of 16  $\mu$ l of SF buffer, 2  $\mu$ l of 20  $\mu$ g/  $\mu$ l  
661 pUC19; 1  $\mu$ l of 250 mM ATP, pH 7.5; 1  $\mu$ l of 100 mg/ml Sodium Heparin; and 1  $\mu$ l of  
662 each reporter DNA construct at 5  $\mu$ g/ $\mu$ l. Transfections were carried out in 96-well  
663 nucleofection plate (Lonza) in a Nucleofector 4d 96-well Nucleofection unit (Lonza) with  
664 the CM 156 pulse. Immediately after nucleofection, 100  $\mu$ l of ice-cold recovery buffer  
665 (10 mM HEPES-KOH, pH 7.5; 0.9 M Sorbitol; 8% (w/v) PEG 8000) was added to the  
666 cells and incubated for 5 min. The whole volume of the transfection reaction plus the  
667 recovery buffer was transferred to 1 ml of 1x HN media in a 12-well plate. After cells  
668 recovered for 1 hr, 5  $\mu$ l of a 10 mg frozen *E. pacifica* pellet resuspend in 1 ml of AK  
669 seawater was added to each well and if 1:500 *Algoriphagus* OMVs were added if  
670 looking at rosette induction.

### 671 **Transgenic Complementation**

672 For complementation, Jumble mutants were transfected with the following  
673 constructs: (1) *pefl-puro-P2A-Jumble-mTFP*, (2) *pefl-puro-P2A-Jumble<sup>lw1</sup>-mTFP*, (3)  
674 *pefl-puro-P2A-mTFP-Jumble*, (4) *pefl-puro-P2A-mTFP-Jumble<sup>lw1</sup>*, and (5) *pefl-puro-*  
675 *P2A-mTFP*; and Couscous with the following constructs: (1) *pefl-puro-P2A-Couscous-*  
676 *mTFP*, (2) *pefl-puro-P2A-Couscous<sup>lw1</sup>-mTFP*, (3) *pefl-puro-P2A-mTFP-Couscous*, (4)  
677 *pefl-puro-P2A-mTFP-Couscous<sup>lw1</sup>*, and (5) *pefl-puro-P2A-mTFP*. Transfected cells were

678 grown an additional 24 hr after transfection to allow for transgene expression, and then  
679 40 µg/ml puromycin was added for selection. Selection occurred for 48 hr before rosette  
680 induction was counted by hemocytometer. After vortexing for 15 sec and fixing with  
681 formaldehyde, 200 cells of each transfection well were counted on a hemocytometer to  
682 determine percentage of cells in rosettes. Rosettes were assessed as clusters of 3 or  
683 more cells. Complementation was repeated on 2 biological replicates with 3 technical  
684 transfection replicates each. Representative rosette images were taken on by confocal  
685 microscopy using Zeiss Axio Observer LSM 880 a C-Apochromat 40x/NA1.20 W Korr  
686 UV-Vis-IR water immersion objective.

### 687 **Live cell imaging**

688 Glass-bottom dishes for live cell imaging were prepared by corona-treating and  
689 poly-D-lysine coating as described in (Booth et al., 2018). Transfected cells were  
690 prepared for microscopy by pelleting 1-2 ml of cells and resuspend in 200 µl of 4/5 ASW  
691 with 100 mM LiCl to slow flagellar beating. Cells were plated on glass-bottom dishes  
692 and covered by 200 µl of 20% (w/v) Ficoll 400 dissolved in 4/5 ASW with 100 mM LiCl.  
693 Confocal microscopy was performed on a Zeiss Axio Observer LSM 880 with an  
694 Airyscan  
695 detector and a 63x/NA1.40 Plan-Apochromatic oil immersion objective.  
696 Confocal stacks were acquired in super-resolution mode using ILEX  
697 Line scanning and two-fold averaging and the following settings: 35 nm x 35 nm pixel  
698 size, 100 nm z-step, 0.9-1.0 µsec/pixel dwell time, 850 gain, 458 nm laser operating at  
699 1-6% laser power, 561 nm laser operating at 1-2% laser power, 458/561 nm multiple

700 beam splitter, and 495-550 nm band-pass/570 nm long-pass filter. Images were initially  
701 processed using the automated Airyscan algorithm (Zeiss).

## 702 **Lectin staining and jacalin quantification**

703 All fluorescein lectins from kits I, II, and III from Vector Lab (FLK-2100, FLK-4100, and  
704 FLK-4100) were tested for recognition in wild type, Jumbled, and Couscous. Cells were  
705 plated on poly-D-Lysine coated wells of a 96-well glass bottom plate, lectins were added  
706 at a concentration of 1:200 and imaged immediately using Zeiss Axio Observer.Z1/7  
707 Widefield microscope with a Hamamatsu Orca-Flash 4.0 LT CMOS Digital Camera and a  
708 20x objective. For further jacalin image analysis, cells were plated on a poly-D-Lysine  
709 coated glass bottom dish, 1:400 fluorescein labelled-jacalin and 1:200 lysotracker Red  
710 DN-99 (overloaded to visualize the cell body) and were imaged immediately by confocal  
711 microscopy using Zeiss Axio Observer LSM 880 a 63x/NA1.40 Plan-Apochromatic oil  
712 immersion objective. Images were taken with the following settings: 66 nm x 66 nm pixel  
713 size, 64 nm z-step, 0.34  $\mu$ sec/pixel dwell time, 488 nm laser operating at 0.2% laser  
714 power with 700 master gain, and 561 nm laser operating at 0.0175% laser power with  
715 750 master gain. Fifteen unique fields of view chosen based on lysotracker staining.  
716 Induced cells were treated with 1:500 OMVs 24 hr before imaging.

717 To process images, Z-stack images were max projected using ImageJ. Individual  
718 cells were chosen based on the ability to clearly see a horizontally oriented collar by  
719 lysotracker and cropped to only include a single cell. The maximum fluorescence  
720 intensity pixel of the jacalin channel was determined for the cropped image and was  
721 used to normalize the fluorescence intensity. To measure jacalin staining around the  
722 cell body, a line was drawn using only the lysotracker staining from the point where the



723 collar and the cell body meet on one side of the cell around the cell to the other and the  
724 fluorescence intensity was measured along the line. To compare between cells, the  
725 lines drawn around the cell body were one-dimensional interpolated in R to include 150  
726 points and normalized to the length of the line. The average fluorescence intensity was  
727 plotted over the length of the line drawn around the cell body for Jumble, Couscous, and  
728 wild type induced and uninduced with a 95% confidence interval. Measurements were  
729 taken from two biological replicates with at least 59 cells in total from each condition.

### 730 **Wild type and mutant growth curves**

731 All cells strains were plated at a density of  $1 \times 10^4$  cells/ml in 3 ml HN media.  
732 Every 12 hr an aliquot of cells was vortexed vigorously for 15 sec, fixed with  
733 formaldehyde, and counted by hemacytometer. Curves were generated from the  
734 average  $\pm$  SD from 2 biological replicates with 3 technical replicates each.

### 735 **Wild type and mutant clumping assays**

736 Wild type cells expressing cytoplasmic mWasabi fused to a puromycin resistance  
737 cassette under the *efl* promoter were generated and maintained in 40  $\mu$ g/mL puromycin  
738 to enrich for positive transformants. For clumping assays, equal numbers of mWasabi-  
739 wt cells either uninduced or induced to form rosettes were mixed with either Jumble or  
740 Couscous, vortexed, and plated on BSA treated 8-well glass bottom dishes. DIC and  
741 fluorescent images were obtained after 30 mins using Zeiss Axio Observer.Z1/7  
742 Widefield microscope with a Hamamatsu Orca-Flash 4.0 LT CMOS Digital Camera and a  
743 40x/NA1.40 Plan-Apochromatic lens.

### 744 **Rosetteless immunofluorescence staining and imaging**

745 Immunofluorescence was performed previously described (Levin et al., 2014)  
746 with the modifications for better cytoskeleton preservation described in (Booth et al.,  
747 2018). Two mL of dense wild type, Jumble, and Couscous cells, that were either  
748 uninduced or induced with 1:500 *Algoriphagus* OMVS for 24 hr, were allowed to settle  
749 on poly-L-lysine coated coverslips (BD Biosciences) for 30 min. Cells were fixed in two  
750 steps: 6% acetone in cytoskeleton buffer (10 mM MES, pH 6.1; 138 KCl, 3 mM MgCl<sub>2</sub>; 2  
751 mM EGTA; 675 mM Sucrose) for 5 and 4% formaldehyde with diluted in cytoskeleton  
752 buffer for 20 min. The coverslips were gently washed three times with cytoskeleton  
753 buffer. Cells were permeabilized with permeabilization buffer [100 mM PIPES, pH 6.95;  
754 2 mM EGTA; 1 mM MgCl<sub>2</sub>; 1% (w/v) bovine serum albumin-fraction V; 0.3% (v/v) Triton  
755 X-100] for 30 min. Cells were stained with the anti-Rosetteless genomic antibody at  
756 3.125 ng/μl (1:400), E7 anti-tubulin antibody (1:1000; Developmental Studies  
757 Hybridoma Bank), Alexa fluor 488 anti-mouse and Alexa fluor 647 anti-rabbit secondary  
758 antibodies (1:1000 each; Molecular Probes), and 6 U/ml rhodamine phalloidin  
759 (Molecular Probes) before mounting in Prolong Gold antifade reagent with DAPI  
760 (Molecular Probes).

761 Images were acquired on a Zeiss LSM 880 Airyscan confocal microscope with a  
762 63x objective (as described for live cell imaging) by frame scanning in the super-  
763 resolution mode with the following settings: 30 nm x 30 nm pixel size; 100 nm z-step;  
764 561 nm laser operating at 1.5% power with 700 master gain, and 488 nm laser  
765 operating at 2.0% power with 800 master gain. Wild type rosettes were imaged with 633  
766 nm laser operating at 0.3% laser power and 650 master gain to prevent overexposure of

767 Rosetteless, but all other conditions were operating at 2% laser power and 650 master  
768 gain in the 633 nm channel.

### 769 **Jacalin western blot**

770 Whole cell lysates were made from pelleting  $1 \times 10^7$  cells at 4C at 3,000 x g and  
771 resuspending in lysis buffer (20 mM Tris-HCl, pH 8.0; 150 mM KCl; 5 mM MgCl<sub>2</sub>; 250  
772 mM Sucrose; 1 mM DTT; 10 mM Digitonin; 1 mg/ml Sodium Heparin; 1 mM Pefabloc  
773 SC; 0.5 U/ $\mu$ l DNaseI; 1 U/ $\mu$ l SUPERaseIN). Cells were incubated in lysis buffer for 10  
774 min on ice and passed through 30G needle 5x. Insoluble material was pelleted at 6,000  
775 x g for 10 min at 4C. Lysate ( $1 \times 10^6$  cells/sample) was run on 4-20% TGX mini-gel (Bio-  
776 Rad) for 45 min at 200 V and transferred onto 0.2  $\mu$ m nitrocellulose membrane using  
777 Trans-Blot Turbo Transfer System (Bio-Rad) with semi-dry settings 25V for min. The  
778 blot was blocked for 30 min with Odyssey PBS Block (Li-cor). The blot was probed with  
779 biotinylated jacalin (1:4,000) and E7 anti-tubulin antibody (1:10,000; Developmental  
780 Studies Hybridoma Bank) diluted in block for 1 hr, and then with IRDye 800 streptavidin  
781 (1:1,000; Li-cor) and IRDye 700 mouse (1:1,000; Li-cor) in PBST [PBS with %1 Tween  
782 20 (v/v)]. Blot was imaged on Licor Odyssey.

783

### 784 **ACKNOWLEDGEMENTS**

785 Hannah Elzinga, Lily Helfrich, and Max Coyle helped with experiments and  
786 reagent preparation. We thank members of the King lab for helpful discussions,  
787 research support, mutant naming suggestions, and comments on the manuscript,  
788 especially Kayley Hake, Ben Larson, Tess Linden, and Thibaut Brunet. This work used

789 the Vincent J. Coates Genomics Sequencing Laboratory at UC Berkeley, supported by  
790 NIH S10 OD018174 Instrumentation Grant.  
791

## 792 REFERENCES

- 793 Alegado RA, Brown LW, Cao S, Dermenjian RK, Zuzow R, Fairclough SR, Clardy J,  
794 King N. 2012. A bacterial sulfonolipid triggers multicellular development in the  
795 closest living relatives of animals. *Elife* **2012**:1–16. doi:10.7554/eLife.00013
- 796 Bolger AM, Lohse M, Usadel B. 2014. Trimmomatic: A flexible trimmer for Illumina  
797 sequence data. *Bioinformatics* **30**:2114–2120. doi:10.1093/bioinformatics/btu170
- 798 Bonner JT. 1998. The origins of multicellularity. *Integr Biol Issues, News, Rev* **1**:27–36.  
799 doi:10.1002/(SICI)1520-6602(1998)1:1<27::AID-INBI4>3.0.CO;2-6
- 800 Booth DS, Middleton H, King N, Szmidt-middleton H, King N. 2018. A robust method for  
801 transfection in choanoflagellates illuminates their cell biology and the ancestry of  
802 animal septins. *bioRxiv*. doi:<https://doi.org/10.1101/343111>
- 803 Brown PJ, Gill AC, Nugent PG, McVey JH, Tomley FM. 2001. Domains of invasion  
804 organelle proteins from apicomplexan parasites are homologous with the Apple  
805 domains of blood coagulation factor XI and plasma pre-kallikrein and are members  
806 of the PAN module superfamily. *FEBS Lett* **497**:31–38. doi:10.1016/S0014-  
807 5793(01)02424-3
- 808 Brunet T, King N. 2017. The Origin of Animal Multicellularity and Cell Differentiation.  
809 *Dev Cell* **43**:124–140. doi:10.1016/j.devcel.2017.09.016
- 810 Carvalho S, Catarino TA, Dias AM, Kato M, Almeida A, Hessling B, Figueiredo J,  
811 Gartner F, Sanches JM, Ruppert T, Miyoshi E, Pierce M, Carneiro F, Kolarich D,  
812 Seruca R, Yamaguchi Y, Taniguchi N, Reis CA, Pinho SS. 2016. Preventing E-  
813 cadherin aberrant N-glycosylation at Asn-554 improves its critical function in gastric  
814 cancer. *Oncogene* **35**:1619–1631. doi:10.1038/onc.2015.225
- 815 Danecek P, Auton A, Abecasis G, Albers CA, Banks E, DePristo MA, Handsaker RE,  
816 Lunter G, Marth GT, Sherry ST, McVean G, Durbin R. 2011. The variant call format  
817 and VCFtools. *Bioinformatics* **27**:2156–2158. doi:10.1093/bioinformatics/btr330
- 818 Dayel MJ, Alegado RA, Fairclough SR, Levin TC, Nichols SA, McDonald K, King N.  
819 2011a. Cell differentiation and morphogenesis in the colony-forming  
820 choanoflagellate *Salpingoeca rosetta*. *Dev Biol* **357**:73–82.  
821 doi:10.1016/j.ydbio.2011.06.003
- 822 Depristo MA, Banks E, Poplin R, Garimella K V., Maguire JR, Hartl C, Philippakis AA,  
823 Del Angel G, Rivas MA, Hanna M, McKenna A, Fennell TJ, Kernytsky AM,  
824 Sivachenko AY, Cibulskis K, Gabriel SB, Altshuler D, Daly MJ. 2011. A framework  
825 for variation discovery and genotyping using next-generation DNA sequencing  
826 data. *Nat Genet* **43**:491–501. doi:10.1038/ng.806
- 827 Doitsidou M, Poole RJ, Sarin S, Bigelow H, Hobert O. 2010. *C. elegans* mutant

- 828 identification with a one-step whole-genome-sequencing and SNP mapping  
829 strategy. *PLoS One* **5**:1–7. doi:10.1371/journal.pone.0015435
- 830 El-Battari A. 2006. Autofluorescent Proteins for Monitoring the Intracellular Distribution  
831 of Glycosyltransferases. *Methods Enzymol* **416**:102–120. doi:10.1016/S0076-  
832 6879(06)16007-3
- 833 Fairclough SR, Chen Z, Kramer E, Zeng Q, Young S, Robertson HM, Begovic E,  
834 Richter DJ, Russ C, Westbrook MJ, Manning G, Lang BF, Haas B, Nusbaum C,  
835 King N. 2013. Premetazoan genome evolution and the regulation of cell  
836 differentiation in the choanoflagellate *Salpingoeca rosetta*. *Genome Biol* **14**:1–15.  
837 doi:10.1186/gb-2013-14-2-r15
- 838 Fairclough SR, Dayel MJ, King N. 2010. Multicellular development in a choanoflagellate.  
839 *Curr Biol* **20**:875–876. doi:10.1016/j.cub.2010.09.014
- 840 Finn RD, Attwood TK, Babbitt PC, Bateman A, Bork P, Bridge AJ, Chang HY, Dosztanyi  
841 Z, El-Gebali S, Fraser M, Gough J, Haft D, Holliday GL, Huang H, Huang X, Letunic  
842 I, Lopez R, Lu S, Marchler-Bauer A, Mi H, Mistry J, Natale DA, Necci M, Nuka G,  
843 Orengo CA, Park Y, Pesseat S, Piovesan D, Potter SC, Rawlings ND, Redaschi N,  
844 Richardson L, Rivoire C, Sangrador-Vegas A, Sigrist C, Sillitoe I, Smithers B,  
845 Squizzato S, Sutton G, Thanki N, Thomas PD, Tosatto SCE, Wu CH, Xenarios I,  
846 Yeh LS, Young SY, Mitchell AL. 2017. InterPro in 2017-beyond protein family and  
847 domain annotations. *Nucleic Acids Res* **45**:D190–D199. doi:10.1093/nar/gkw1107
- 848 Finn RD, Coggill P, Eberhardt RY, Eddy SR, Mistry J, Mitchell AL, Potter SC, Punta M,  
849 Qureshi M, Sangrador-Vegas A, Salazar GA, Tate J, Bateman A. 2016. The Pfam  
850 protein families database: Towards a more sustainable future. *Nucleic Acids Res*  
851 **44**:D279–D285. doi:10.1093/nar/gkv1344
- 852 Gilbert OM, Foster KR, Mehdiabadi NJ, Strassmann JE, Queller DC. 2007. High  
853 relatedness maintains multicellular cooperation in a social amoeba by controlling  
854 cheater mutants. *Proc Natl Acad Sci* **104**:8913–8917.  
855 doi:10.1073/pnas.0702723104
- 856 Granovsky M, Fata J, Pawling J, Muller WJ, Khokha R, Dennis JW. 2000. Suppression  
857 of tumor growth and metastasis in Mgat5-deficient mice. *Nat Med* **6**:306–312.  
858 doi:10.1038/73163
- 859 Guo HB, Johnson H, Randolph M, Pierce M. 2009. Regulation of homotypic cell-cell  
860 adhesion by branched N-glycosylation of N-cadherin extracellular EC2 and EC3  
861 domains. *J Biol Chem* **284**:34986–34997. doi:10.1074/jbc.M109.060806
- 862 Hirohashi S, Kanai Y. 2003. Cell adhesion system and human cancer morphogenesis.  
863 *Cancer Sci* **94**:575–581. doi:10.1111/j.1349-7006.2003.tb01485.x
- 864 Ho DH, Badellino K, Baglia FA, Walsh PN. 1998. A Binding Site for Heparin in the Apple  
865 3 Domain of Factor XI. *J Biol Chem* **273**:16382–16390.

- 866 Kelly LA, Mezulis S, Yates C, Wass M, Sternberg M. 2015. The Phyre2 web portal for  
867 protein modelling, prediction, and analysis. *Nat Protoc* **10**:845–858.  
868 doi:10.1038/nprot.2015-053
- 869 Kim JH, Lee SR, Li LH, Park HJ, Park JH, Lee KY, Kim MK, Shin BA, Choi SY. 2011.  
870 High cleavage efficiency of a 2A peptide derived from porcine teschovirus-1 in  
871 human cell lines, zebrafish and mice. *PLoS One* **6**:1–8.  
872 doi:10.1371/journal.pone.0018556
- 873 King N. 2004. The unicellular ancestry of animal development. *Dev Cell* **7**:313–325.  
874 doi:10.1016/j.devcel.2004.08.010
- 875 King N, Westbrook MJ, Young SL, Kuo A, Abedin M, Chapman J, Fairclough S, Hellsten  
876 U, Isogai Y, Letunic I, Marr M, Pincus D, Putnam N, Rokas A, Wright KJ, Zuzow R,  
877 Dirks W, Good M, Goodstein D, Lemons D, Li W, Lyons JB, Morris A, Nichols S,  
878 Richter DJ, Salamov A, Bork P, Lim WA, Manning G, Miller WT, McGinnis W,  
879 Shapiro H, Tjian R, Grigoriev I V., Rokhsar D, Sequencing JGI, Bork P, Lim WA,  
880 Manning G, Miller WT, McGinnis W, Shapiro H, Tjian R, Grigoriev I V., Rokhsar D.  
881 2008. The genome of the choanoflagellate *Monosiga brevicollis* and the origin of  
882 metazoans. *Nature* **451**:783–8. doi:10.1038/nature06617
- 883 Knoll AH. 2011. The Multiple Origins of Complex Multicellularity. *Annu Rev Earth Planet*  
884 *Sci* **39**:217–239. doi:10.1146/annurev.earth.031208.100209
- 885 Kuzdzal-Fick JJ, Fox SA, Strassman JE, Queller DC. 2011. High Relatedness Is  
886 Necessary and Sufficient to Maintain Multicellularity in *Dictyostelium*. *Science*  
887 **334**:1548–1551. doi:10.3334/ORNLDAAAC/797
- 888 Lairson LL, Henrissat B, Davies GJ, Withers SG. 2008. Glycosyltransferases:  
889 Structures, Functions, and Mechanisms. *Annu Rev Biochem* **77**:521–555.  
890 doi:10.1146/annurev.biochem.76.061005.092322
- 891 Larkin MA, Blackshields G, Brown NP, Chenna R, Mcgettigan PA, McWilliam H,  
892 Valentin F, Wallace IM, Wilm A, Lopez R, Thompson JD, Gibson TJ, Higgins DG.  
893 2007. Clustal W and Clustal X version 2.0. *Bioinformatics* **23**:2947–2948.  
894 doi:10.1093/bioinformatics/btm404
- 895 Larsen ISB, Narimatsu Y, Joshi HJ, Siukstaite L, Harrison OJ, Brasch J, Goodman KM,  
896 Hansen L, Shapiro L, Honig B, Vakhrushev SY, Clausen H, Halim A. 2017.  
897 Discovery of an O-mannosylation pathway selectively serving cadherins and  
898 protocadherins. *Proc Natl Acad Sci* **114**:201708319. doi:10.1073/pnas.1708319114
- 899 Leadbeater BS. 2015. The choanoflagellates: evolution, biology, and ecology, 1st ed.  
900 Cambridge: Cambridge University Press.
- 901 Leigh EG, Smith JM, Szathmary E. 1995. The Major Transitions of Evolution. *Evolution*.  
902 doi:10.2307/2410462

- 903 Leshchiner I, Alexa K, Kelsey P, Adzhubei I, Austin-Tse CA, Cooney JD, Anderson H,  
904 King MJ, Stottmann RW, Garnaas MK, Ha S, Drummond IA, Paw BH, North TE,  
905 Beier DR, Goessling W, Sunyaev SR. 2012. Mutation mapping and identification by  
906 whole-genome sequencing. *Genome Res* **22**:1541–1548.  
907 doi:10.1101/gr.135541.111
- 908 Levin TC, Greaney AJ, Wetzel L, King N. 2014. The Rosetteless gene controls  
909 development in the choanoflagellate *S. rosetta*. *Elife* **3**:e04070.  
910 doi:10.7554/eLife.04070
- 911 Levin TC, King N. 2013. Evidence for Sex and Recombination in the Choanoflagellate  
912 *Salpingoeca rosetta*. *Curr Biol* **23**:2176–2180. doi:10.1016/j.cub.2013.08.061
- 913 Li H, Durbin R. 2009. Fast and accurate short read alignment with Burrows-Wheeler  
914 transform. *Bioinformatics* **25**:1754–1760. doi:10.1093/bioinformatics/btp324
- 915 Li H, Handsaker B, Wysoker A, Fennell T, Ruan J, Homer N, Marth G, Abecasis G,  
916 Durbin R. 2009. The Sequence Alignment/Map format and SAMtools.  
917 *Bioinformatics* **25**:2078–2079. doi:10.1093/bioinformatics/btp352
- 918 Lister R, Gregory BD, Ecker JR. 2009. Next is now: new technologies for sequencing of  
919 genomes, transcriptomes, and beyond. *Curr Opin Plant Biol* **12**:107–118.  
920 doi:10.1016/j.pbi.2008.11.004
- 921 Marchler-Bauer A, Bo Y, Han L, He J, Lanczycki CJ, Lu S, Chitsaz F, Derbyshire MK,  
922 Geer RC, Gonzales NR, Gwadz M, Hurwitz DI, Lu F, Marchler GH, Song JS,  
923 Thanki N, Wang Z, Yamashita RA, Zhang D, Zheng C, Geer LY, Bryant SH. 2017.  
924 CDD/SPARCLE: Functional classification of proteins via subfamily domain  
925 architectures. *Nucleic Acids Res* **45**:D200–D203. doi:10.1093/nar/gkw1129
- 926 Müller WE, Zahn RK, Kurelec B, Müller I, Uhlenbruck G, Vaith P. 1979. Aggregation of  
927 sponge cells. *J Biol Chem* **254**:1280–1287.
- 928 Nedashkovskaya OI, Kim SB, Vancanneyt M, Lysenko AM, Shin DS, Park MS, Lee KH,  
929 Jung WJ, Kalinovskaya NI, Mikhailov V V., Bae KS, Swings J. 2006. *Echinicola*  
930 *pacifica* gen. nov., sp. nov., a novel flexibacterium isolated from the sea urchin  
931 *Strongylocentrotus intermedius*. *Int J Syst Evol Microbiol* **56**:953–958.  
932 doi:10.1099/ijs.0.64156-0
- 933 Nichols SA, Roberts BW, Richter DJ, Fairclough SR, King N. 2012. Origin of metazoan  
934 cadherin diversity and the antiquity of the classical cadherin/ $\beta$ -catenin complex.  
935 *Proc Natl Acad Sci U S A* **109**:13046–51. doi:10.1073/pnas.1120685109
- 936 Pomraning KR, Smith KM, Freitag M. 2011. Bulk segregant analysis followed by high-  
937 throughput sequencing reveals the *Neurospora* cell cycle gene, *ndc-1*, to be allelic  
938 with the gene for ornithine decarboxylase, *spe-1*. *Eukaryot Cell* **10**:724–733.  
939 doi:10.1128/EC.00016-11



- 940 Ratcliff WC, Denison RF, Borrello M, Travisano M. 2012. Experimental evolution of  
941 multicellularity. *Proc Natl Acad Sci* **109**:1595–1600. doi:10.1073/pnas.1115323109
- 942 Ratcliff WC, Herron MD, Howell K, Pentz JT, Rosenzweig F, Travisano M. 2013.  
943 Experimental evolution of an alternating uni- and multicellular life cycle in  
944 *Chlamydomonas reinhardtii*. *Nat Commun* **4**:1–7. doi:10.1038/ncomms3742
- 945 Rayner JC, Munro S. 1998. Identification of the MNN2 and MNN5  
946 mannosyltransferases required for forming and extending the mannose branches of  
947 the outer chain mannans of *Saccharomyces cerevisiae*. *J Biol Chem* **273**:26836–  
948 26843. doi:10.1074/jbc.273.41.26836
- 949 Richter DJ, Fozouni P, Eisen MB, King N. 2018. Gene family innovation, conservation  
950 and loss on the animal stem lineage. *Elife* **7**. doi:10.7554/eLife.34226
- 951 Rokas A. 2008. The Origins of Multicellularity and the Early History of the Genetic  
952 Toolkit For Animal Development. *Annu Rev Genet* **42**:235–251.  
953 doi:10.1146/annurev.genet.42.110807.091513
- 954 Ruiz-Trillo I, Roger AJ, Burger G, Gray MW, Lang BF. 2008. A phylogenomic  
955 investigation into the origin of Metazoa. *Mol Biol Evol* **25**:664–672.  
956 doi:10.1093/molbev/msn006
- 957 Sawaguchi S, Varshney S, Ogawa M, Sakaidani Y, Yagi H, Takeshita K, Murohara T,  
958 Kato K, Sundaram S, Stanley P, Okajima T. 2017. O-GlcNAc on NOTCH1 EGF  
959 repeats regulates ligand-induced Notch signaling and vascular development in  
960 mammals. *Elife* 1–30. doi:10.7554/eLife.24419
- 961 Schalchian-Tabrizi K, Minge MA, Espelund M, Orr R, Ruden T, Jakobsen KS, Cavalier-  
962 Smith T. 2008. Multigene phylogeny of Choanozoa and the origin of animals. *PLoS*  
963 *One* **3**. doi:10.1371/journal.pone.0002098
- 964 Schneeberger K, Ossowski S, Lanz C, Juul T, Petersen AH, Nielsen KL, Jørgensen JE,  
965 Weigel D, Andersen SU. 2009. SHOREmap: Simultaneous mapping and mutation  
966 identification by deep sequencing. *Nat Methods* **6**:550–551.  
967 doi:10.1038/nmeth0809-550
- 968 Strahl-Bolsinger S, Gentsch M, Tanner W. 1999. Protein O-mannosylation. *Biochim*  
969 *Biophys Acta - Gen Subj* **1426**:297–307. doi:10.1016/S0304-4165(98)00131-7
- 970 Stratford M. 1992. Yeast Flocculation : Receptor Definition by mnn Mutants and  
971 Concanavalin A. *Yeast* **8**:635–645.
- 972 Tordai H, Bányai L, Patthy L. 1999. The PAN module: The N-terminal domains of  
973 plasminogen and hepatocyte growth factor are homologous with the apple domains  
974 of the prekallikrein family and with a novel domain found in numerous nematode  
975 proteins. *FEBS Lett* **461**:63–67. doi:10.1016/S0014-5793(99)01416-7

- 976 Tu L, Banfield DK. 2010. Localization of Golgi-resident glycosyltransferases. *Cell Mol*  
977 *Life Sci* **67**:29–41. doi:10.1007/s00018-009-0126-z
- 978 Voz ML, Coppieters W, Manfroid I, Baudhuin A, von Berg V, Charlier C, Meyer D,  
979 Driever W, Martial JA, Peers B. 2012. Fast homozygosity mapping and  
980 identification of a zebrafish enu-induced mutation by whole-genome sequencing.  
981 *PLoS One* **7**:1–10. doi:10.1371/journal.pone.0034671
- 982 Wang Y, Wang F, Wang R, Zhao P, Xia Q. 2015. 2A self-cleaving peptide-based multi-  
983 gene expression system in the silkworm *Bombyx mori*. *Sci Rep* **5**:16273.  
984 doi:10.1038/srep16273
- 985 Wenger JW, Schwartz K, Sherlock G. 2010. Bulk segregant analysis by high-throughput  
986 sequencing reveals a novel xylose utilization gene from *Saccharomyces cerevisiae*.  
987 *PLoS Genet* **6**:18. doi:10.1371/journal.pgen.1000942
- 988 Wiggins C a, Munro S. 1998. Activity of the yeast MNN1 alpha-1,3-mannosyltransferase  
989 requires a motif conserved in many other families of glycosyltransferases. *Proc Natl*  
990 *Acad Sci U S A* **95**:7945–7950. doi:10.1073/pnas.95.14.7945
- 991 Woznica A, Cantley AM, Beemelmans C, Freinkman E, Clardy J, King N. 2016.  
992 Bacterial lipids activate, synergize, and inhibit a developmental switch in  
993 choanoflagellates. *Proc Natl Acad Sci* **113**:7894–7899.  
994 doi:10.1073/pnas.1605015113
- 995 Woznica A, Gerdt JP, Hulett RE, Clardy J, King N. 2017. Mating in the Closest Living  
996 Relatives of Animals Is Induced by a Bacterial Chondroitinase. *Cell* **170**:1175–  
997 1183.e11. doi:10.1016/j.cell.2017.08.005
- 998 Zhang L, Zhang Y, Ten Hagen KG. 2008. A mucin-type O-glycosyltransferase  
999 modulates cell adhesion during *Drosophila* development. *J Biol Chem* **283**:34076–  
1000 34086. doi:10.1074/jbc.M804267200
- 1001 Zhao Y, Sato Y, Isaji T, Fukuda T, Matsumoto A, Miyoshi E, Gu J, Taniguchi N. 2008.  
1002 Branched N-glycans regulate the biological functions of integrins and cadherins.  
1003 *FEBS J* **275**:1939–1948. doi:10.1111/j.1742-4658.2008.06346.x
- 1004 Zimmermann L, Stephens A, Nam SZ, Rau D, Kübler J, Lozajic M, Gabler F, Söding J,  
1005 Lupas AN, Alva V. 2017. A Completely Reimplemented MPI Bioinformatics Toolkit  
1006 with a New HHpred Server at its Core. *J Mol Biol* **430**:2237–2243.  
1007 doi:10.1016/j.jmb.2017.12.007  
1008

## TABLES

**Table 1. Phenotypes of wild type and Class C strains.**

| Strain    | % cells in rosettes | Cell interactions | Successful outcrossing |
|-----------|---------------------|-------------------|------------------------|
| wild type | 87.7                | Non-clumping      | Yes                    |
| Seafoam   | 0                   | Clumping          | No                     |
| Soapsuds  | 0                   | Clumping          | No                     |
| Couscous  | 0                   | Clumping          | Yes                    |
| Jumble    | 0                   | Clumping          | Yes                    |

**Table 2. Segregating variants in Rosetteless mapping cross.**

| Supercontig | Location       | Position relative to genes | Type         | Coverage <sup>†</sup> |
|-------------|----------------|----------------------------|--------------|-----------------------|
| 4           | 516,051        | intron                     | INDEL*       | 8                     |
| 6           | 1,139,589      | 5' UTR                     | INDEL*       | 40                    |
| <b>8</b>    | <b>427,804</b> | <b>splice donor</b>        | <b>SNV**</b> | <b>253</b>            |
| 11          | 524,974        | intron                     | INDEL*       | 12                    |
| 11          | 1,660,350      | intron                     | INDEL*       | 6                     |

**Average genome-wide coverage: 187**

<sup>†</sup>Number of high quality reads determined by SAMtools (Li et al., 2009) at nucleotide position; \*Insertion or deletion; \*\*Single nucleotide variant; †Highlighted sequence variant indicates known causative lesion (Levin et al., 2014).

**Table 3. Segregating variants in Jumble mapping cross.**

| Supercontig | Location         | Position relative to genes | Type         | Coverage <sup>†</sup> |
|-------------|------------------|----------------------------|--------------|-----------------------|
| <b>1</b>    | <b>1,919,681</b> | <b>coding sequence</b>     | <b>SNV**</b> | <b>165</b>            |
| 20          | 530,561          | intron                     | INDEL*       | 3                     |
| 22          | 65,983           | intron                     | INDEL*       | 37                    |
| 32          | 134,832          | intron                     | INDEL*       | 5                     |
| 49          | 3,863            | intron                     | SNV**        | 2                     |

**Average genome-wide coverage: 187**

<sup>†</sup>Number of high quality reads determined by SAMtools (Li et al., 2009) at nucleotide position; \*Insertion or deletion; \*\*Single nucleotide variant; †Highlighted sequence variant indicates predicted causative lesion.

**Table 4. Segregating variants in Couscous mapping cross.**

| Supercontig | Location       | Position relative to genes | Type          | Coverage <sup>†</sup> |
|-------------|----------------|----------------------------|---------------|-----------------------|
| 3           | 1,812,030      | splice acceptor            | INDEL*        | 2                     |
| 4           | 475,982        | intron                     | INDEL*        | 10                    |
| 4           | 518,253        | intron                     | INDEL*        | 12                    |
| 5           | 533            | intron                     | INDEL*        | 3                     |
| 9           | 141,246        | intron                     | INDEL*        | 3                     |
| 13          | 698,752        | intron                     | INDEL*        | 6                     |
| 22          | 110,265        | intron                     | INDEL*        | 5                     |
| <b>22</b>   | <b>462,534</b> | <b>coding sequence</b>     | <b>INDEL*</b> | <b>128</b>            |

**Average genome-wide coverage: 72**

<sup>†</sup>Number of high quality reads determined by SAMtools (Li et al., 2009) at nucleotide position; \*Insertion or deletion; †Highlighted sequence variant indicates predicted causative lesion.

**Figure 1. Class C mutant cells aggregate and fail to form rosettes. (A)** Wild type cells form linear chains in the absence of rosette inducing factors (RIFs) and develop into organized spherical rosettes with the apical flagellum of each cell pointing outward in response to RIFs. Rosettes are resistant to shear force and survive vortexing. Four class C mutants—Seafoam, Soapsuds, Couscous, and Jumble—form disorganized clumps of cells in the presence and absence of RIFs. The clumps are not resistant to vortexing and fall apart. **(B)** Class C mutants do not form any detectable rosettes. Rosette development was measured as the % of cells in rosettes after 48 hr in the presence of RIFs and is shown as mean  $\pm$  SEM.  $\emptyset$  indicates that no rosettes were observed. **(C)** Automated image analysis allowed quantification of the area of clumps 30 minutes after cells were vortexed in the absence of RIFs. Data are presented as violin boxplots, showing the median cell number (middle line), interquartile range (white box), and range excluding outliers (thin line). All mutants had significantly larger masses of cells (two-tailed t-test \*\*\*\* $p < 0.0001$ ). **(D)** Clumping occurs within minutes after vortexing in the Class C mutants without RIFs. DIC images obtained at 0, 15, and 30 minutes post-vortexing.

# Figure 1

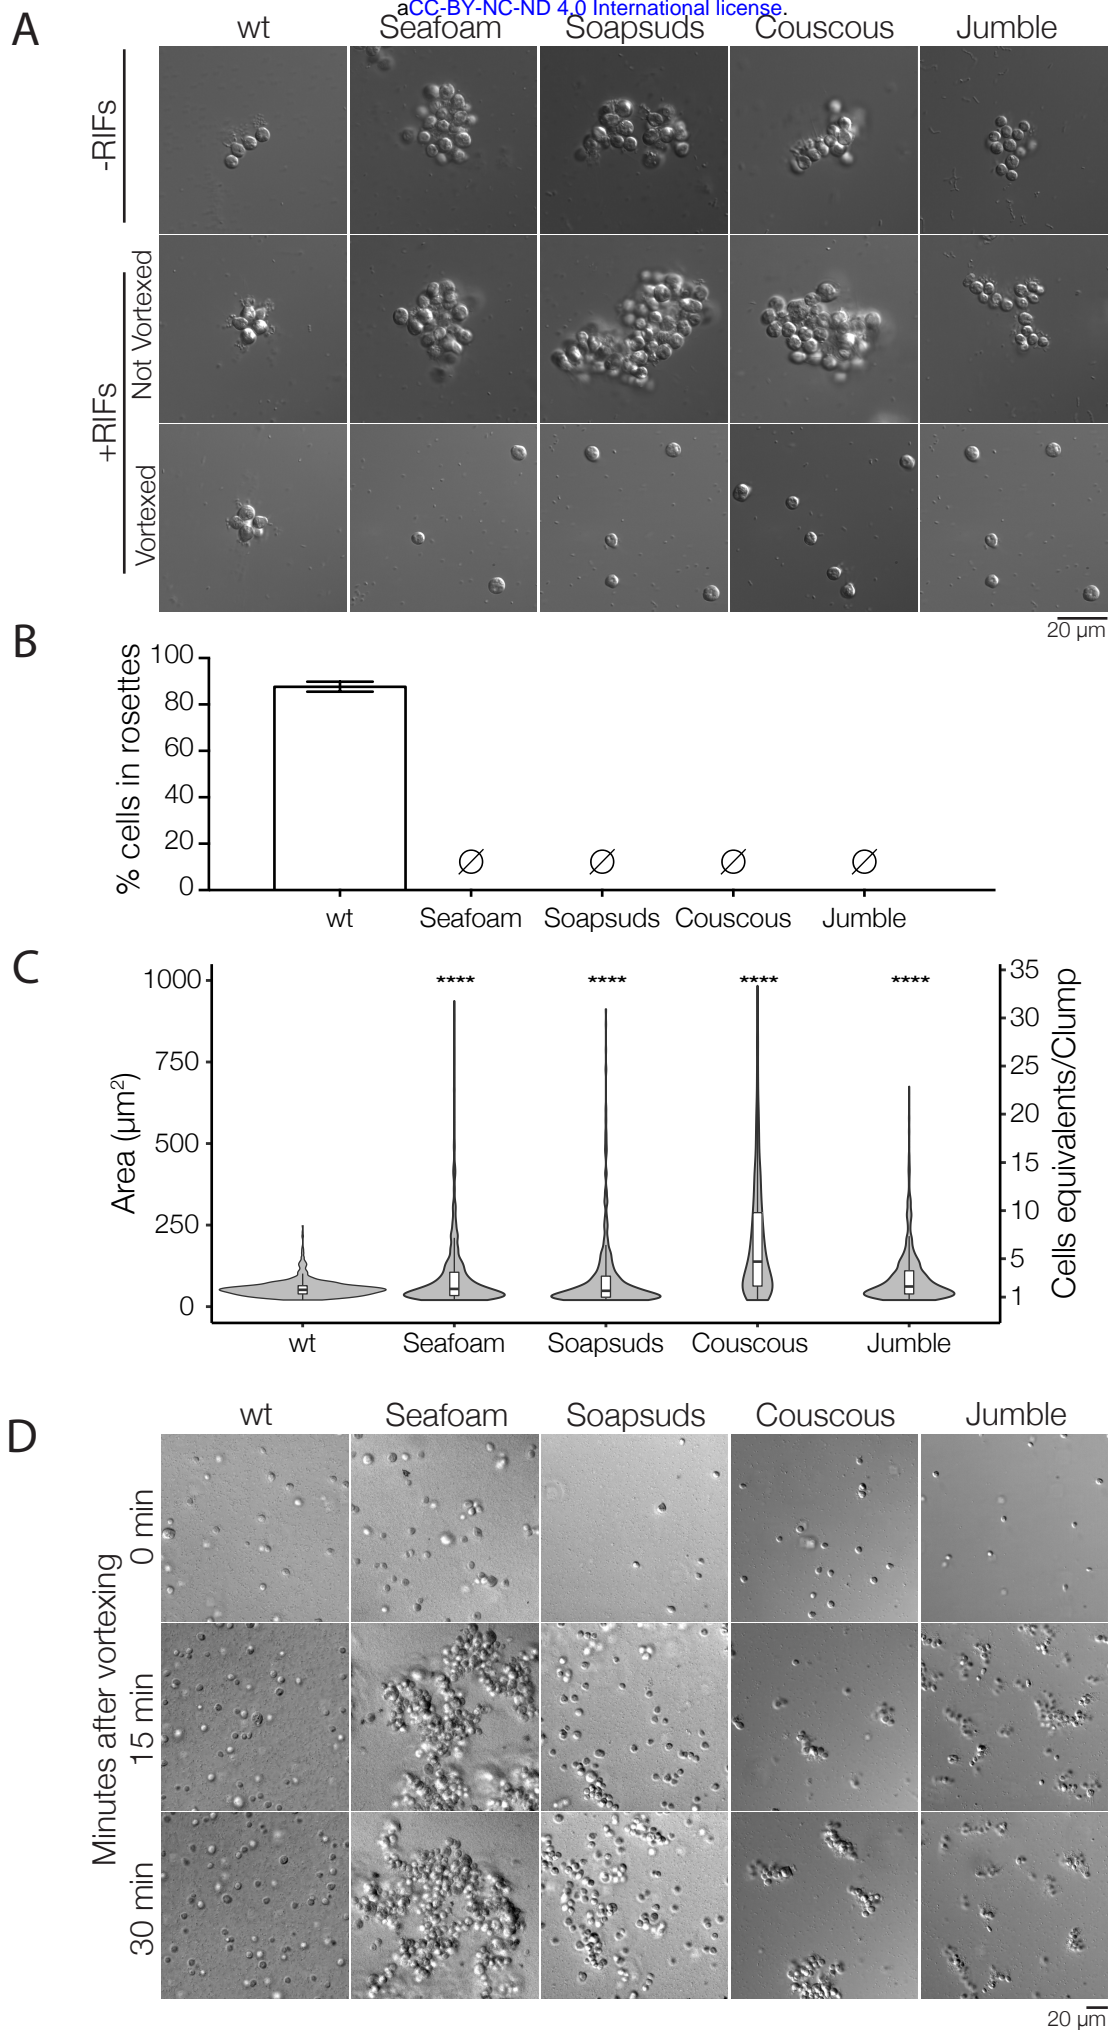

**Figure 2. Jumble maps to a predicted glycosyltransferase that localizes to the**

**Golgi apparatus. (A)** Jumble has a predicted transmembrane domain (marked TM), but no conserved domains by sequence identity. The mutant gene has a T to C mutation at nucleotide 1109 that causes a missense mutation from proline to leucine at amino acid position 305. **(B)** A single mutant F1×Mapping Strain backcross confirms the tight linkage of the *jumble*<sup>lw1</sup> to the clumpy, rosetteless phenotype (Chi-squared test,  $p < 0.001$ ). **(C)** Transgene expression of *jumble-mTFP* and *mTFP-jumble* rescued rosette formation in the Jumble mutant, but *jumble*<sup>lw1</sup>-*mTFP*, *mTFP-jumble*<sup>lw1</sup>, or *mTFP* alone did not. RIFs were immediately after transfection, but 40 µg/mL puromycin was added 24 hours post-transfection. Representative rosette expressing *jumble-mTFP* shown. Rosette development was measured as the % of cells in rosettes 72 hr post-transfection and shown as mean ± SD. ∅ indicates that no rosettes were observed (n=200 cells from 2 biological replicates with 3 technical replicates each). Transgenes of membrane marker-mCherry (magenta) and Jumble-mWasabi (green) under the *efl* promoter were expressed in wild type *S. rosetta* **(D)** without RIFs and **(E)** with RIFs. Jumble-mWasabi localizes to the basal pole of cells, consistent with the localization of the Golgi apparatus. Expression of the mutant Jumble<sup>lw1</sup>-mWasabi transgene in **(F)** without RIFs and **(G)** with RIFs wild type cells incorrectly localizes to the ER and food vacuole. Boxes indicate the presumed location of the Golgi apparatus at the basal pole. Asterisks denote the food vacuole which may be fluorescent due to autofluorescence from ingested bacteria or through accumulation of the fluorescent markers.





**Figure 3. Couscous maps to a predicted mannosyltransferase with a PAN/Apple domain. (A)** Couscous has a predicted signal sequence (marked S), a PAN/Apple domain (marked PAN), and a mannosyltransferase domain. The causative lesion is a 1-base pair deletion at position 2447 to cause a frameshift that leads to an early stop codon at amino acid 741. **(B)** Two F1 mutant×Mapping Strain backcrosses confirmed the tight linkage between the mutation and the rosetteless, clumpy phenotype (Chi-squared test,  $p < 0.001$ ). **(C)** Transgene expression of *couscous-mTFP* or *mTFP-couscous* could rescue rosette formation in Jumble, but not *couscous<sup>lw1</sup>-mTFP*, *mTFP-couscous<sup>lw1</sup>*, or *mTFP* alone. RIFs were immediately after transfection, but 40 µg/mL puromycin was added 24 hours post-transfection. Representative rosette shown. **(D)** Rosette development was measured as the % of cells in rosettes after 72 hr after and is shown as mean ± SD. ∅ indicates that no rosettes were observed (n=200 cells from 2 biological replicates with 3 technical replicates each).

# Figure 3

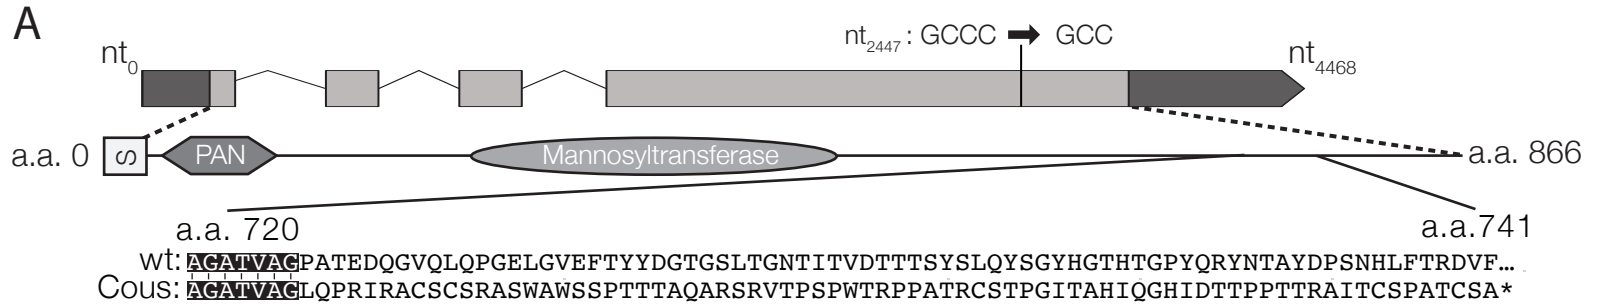

**B**

| Couscous |          |        |
|----------|----------|--------|
|          | Rosettes | Clumps |
| GCCC     | 38       | 0      |
| GCC      | 0        | 51     |

$\chi^2=92.8$ ,  $df=3$ ,  $P < 0.001$

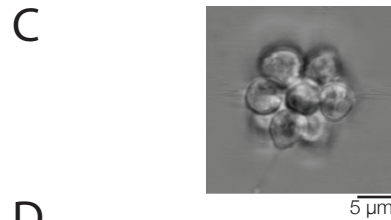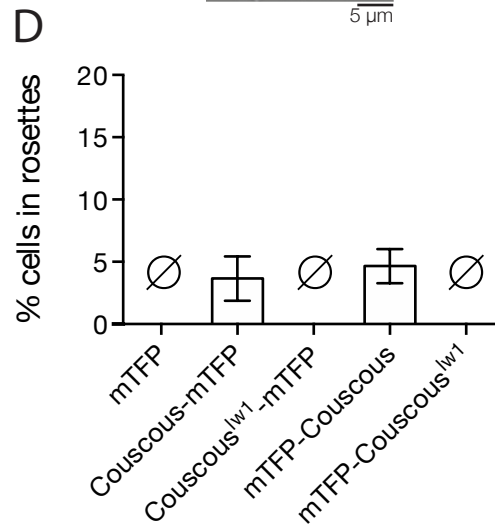

**Figure 4. Jumble and Couscous mutants lack sugar modifications at the basal pole.** Jacalin recognizes a sugar modification at the basal pole of wild type cells in single cells (**B**) and becomes enriched at ECM in the center of rosettes (**A, B'**). Jumble (**C, C'**) and Couscous (**D, D'**) have severely reduced or abolished jacalin at the basal poles of cells, both without and with RIFs. Asterisks mark the apical pole and arrow mark the basal pole. (**E**) Jacalin fluorescence was measured by drawing an arc from one edge of the collar around the cell body to the other edge of the collar, and the line was normalized for cell size and background intensity. (**F**) The average normalized fluorescence intensity from at least 59 cells (n=2 biological replicates) from each condition is graphed against the normalized length of the cell body. Gray shadows indicate 95% confidence intervals.

# Figure 4

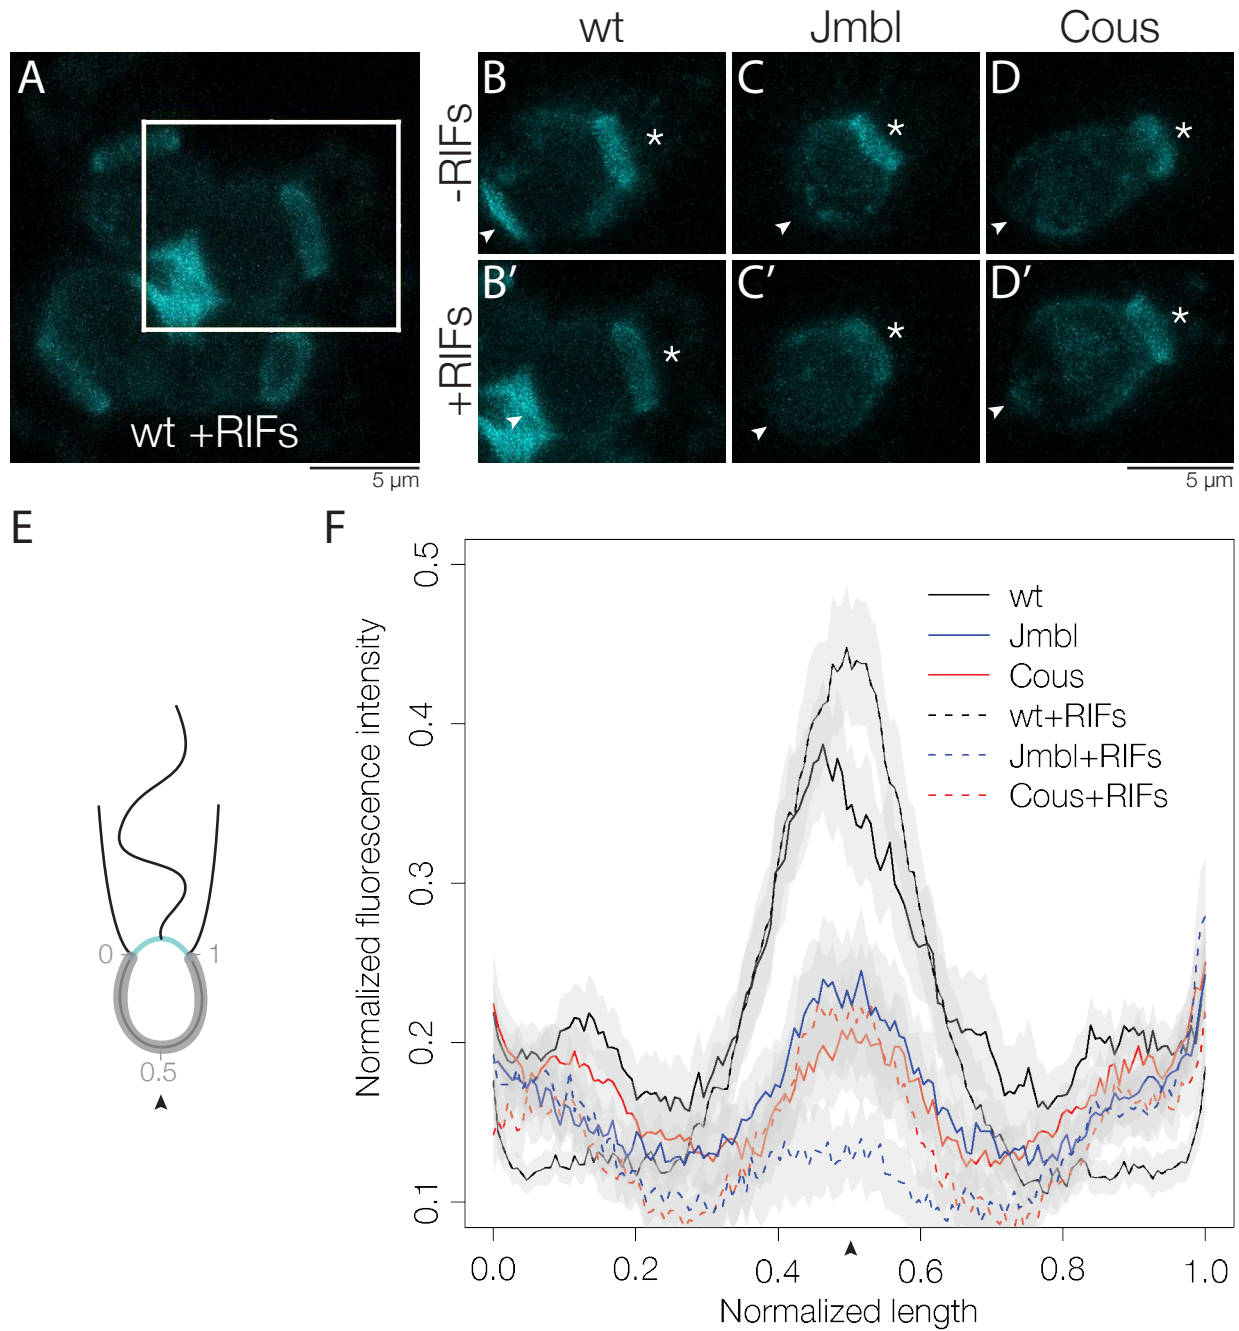

**Figure 5. Model for promiscuous clumping in rosette defective Class C mutants.**

Wild type *S. rosetta* has a glycosylated basal patch of ECM (red) as marked by the lectin jacalin that becomes enriched during the course of rosette formation. The Rosetteless protein, required for rosette formation and speculated to play a structural role in holding rosettes together, localizes to the same location on the basal pole of cells and becomes similarly enriched as rosette form. Mutants lack the glycosylated basal patch observed at the basal pole of wild type cells before induction. The altered cell surface could lead to clumping through either mis-regulating cell adhesion molecules or exposing an adhesive cell surface. The same alteration to the cell surface of Class C mutants may prevent the proper formation of ECM required for rosette formation. Potentially, the disrupted glycan modification could be on the Rosetteless protein or on one of its interaction partners.

# Figure 5

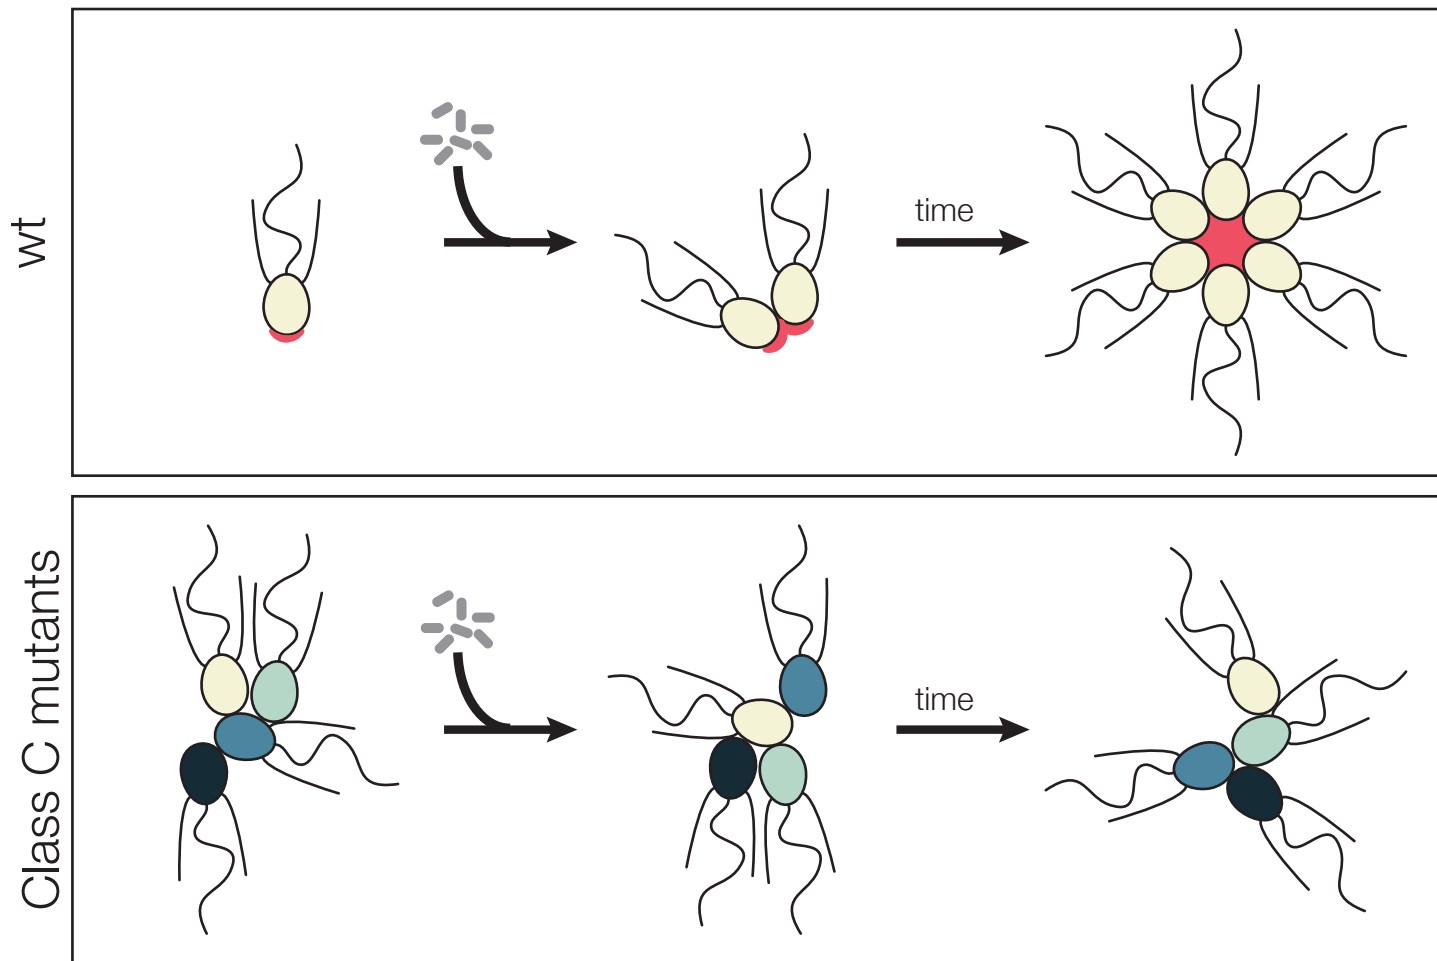

Source: http://biorxiv.org/content/10.1101/384453v1.full.pdf
